# Supplementary material for: Proposed mechanism for diterpene synthases in the formation of phomactatriene and taxadiene
Source: Royal Society of Chemistry journal article supplement (doi:10.1039/b506411b), 2005-01-01

## Supplementary Data

Proposed Mechanism for the Diterpene Synthases in the Formation of Phomactatriene and Taxadiene: Experimental Results on Biosynthetic Study, Biomimetic Reactions and Examination of the Cyclization Pathway by *ab initio* Calculations

Tetsuo Tokiwano, Taeko Endo, Tae Tsukagoshi, Hitoshi Goto, Eri Fukushi, and Hideaki Oikawa\*

### Table of Contents:

1. **Table S1.** MMFF94 and *ab Initio* HF/6-31G\* Energies of Top Five Conformers Found by CONFLEX Search  
-----S2-S3
2. **Figure S1.** Optimized Structures of Top Five Conformers with *ab Initio* HF/6-31G\*Calculation  
-----S4-S8
3. <sup>1</sup>H and <sup>13</sup>C NMR spectra for compounds **9a** isolated from *Phoma sp.*  
-----S9-S14
4. <sup>1</sup>H and <sup>13</sup>C NMR spectra for compounds **9b**, **9c**, **13a**, **13b** and **14** obtained from the acid-catalyzed rearrangements of verticillol (**5**)  
-----S15-S27

**Table S1.** MMFF94 and *ab Initio* HF/6-31G\* Energies of Top Five Conformers Found by CONFLEX Search**A<sup>+</sup>**

| No. | MMFF94       | HF/6-31G(d) |              |
|-----|--------------|-------------|--------------|
|     | $\Delta E^a$ | $E^b$       | $\Delta E^a$ |
| 1   | 0.00         | -776.2916   | 0.00         |
| 2   | 2.29         | -776.2872   | 2.76         |
| 3   | 2.65         | -776.2873   | 2.66         |
| 4   | 3.40         | -776.2862   | 3.39         |
| 5   | 4.94         | -776.2817   | 6.19         |

<sup>a</sup> kcal/mol. <sup>b</sup> au.**G<sup>+</sup>**

| No. | MMFF94       | HF/6-31G(d) |              |
|-----|--------------|-------------|--------------|
|     | $\Delta E^a$ | $E^b$       | $\Delta E^a$ |
| 1   | 0.00         | -776.2906   | 0.00         |
| 2   | 0.32         | -776.2893   | 0.83         |
| 3   | 1.36         | -776.2915   | -0.54        |
| 4   | 1.85         | -776.2895   | 0.70         |
| 5   | 1.94         | -776.2860   | 2.93         |

<sup>a</sup> kcal/mol. <sup>b</sup> au.**F<sup>+</sup>**

| No. | MMFF94       | HF/6-31G(d) |              |
|-----|--------------|-------------|--------------|
|     | $\Delta E^a$ | $E^b$       | $\Delta E^a$ |
| 1   | 0.00         | -776.2965   | 0.00         |
| 2   | 3.05         | -776.2931   | 2.12         |
| 3   | 4.07         | -776.2891   | 4.69         |
| 4   | 4.21         | -776.2883   | 5.15         |
| 5   | 4.45         | -776.2890   | 4.74         |

<sup>a</sup> kcal/mol. <sup>b</sup> au.

**D<sup>+</sup>**

| No. | MMFF94       | HF/6-31G(d) |              |
|-----|--------------|-------------|--------------|
|     | $\Delta E^a$ | $E^b$       | $\Delta E^a$ |
| 1   | 0.00         | -776.2877   | 0.00         |
| 2   | 0.02         | -776.2844   | 2.09         |
| 3   | 0.40         | -776.2850   | 1.70         |
| 4   | 0.84         | -776.2813   | 4.07         |
| 5   | 2.05         | -776.2818   | 3.74         |

<sup>a</sup> kcal/mol. <sup>b</sup> au.

**E<sup>+</sup>**

| No. | MMFF94       | HF/6-31G(d) |              |
|-----|--------------|-------------|--------------|
|     | $\Delta E^a$ | $E^b$       | $\Delta E^a$ |
| 1   | 0.00         | -776.2856   | 0.00         |
| 2   | 0.58         | -776.2851   | 0.30         |
| 3   | 0.95         | -776.2862   | -0.40        |
| 4   | 0.98         | -776.2846   | 0.59         |
| 5   | 1.40         | -776.2829   | 1.67         |

<sup>a</sup> kcal/mol. <sup>b</sup> au.

**Figure S1.** Optimized Structures of Top Five Conformers with *ab Initio* HF/6-31G\* Calculation

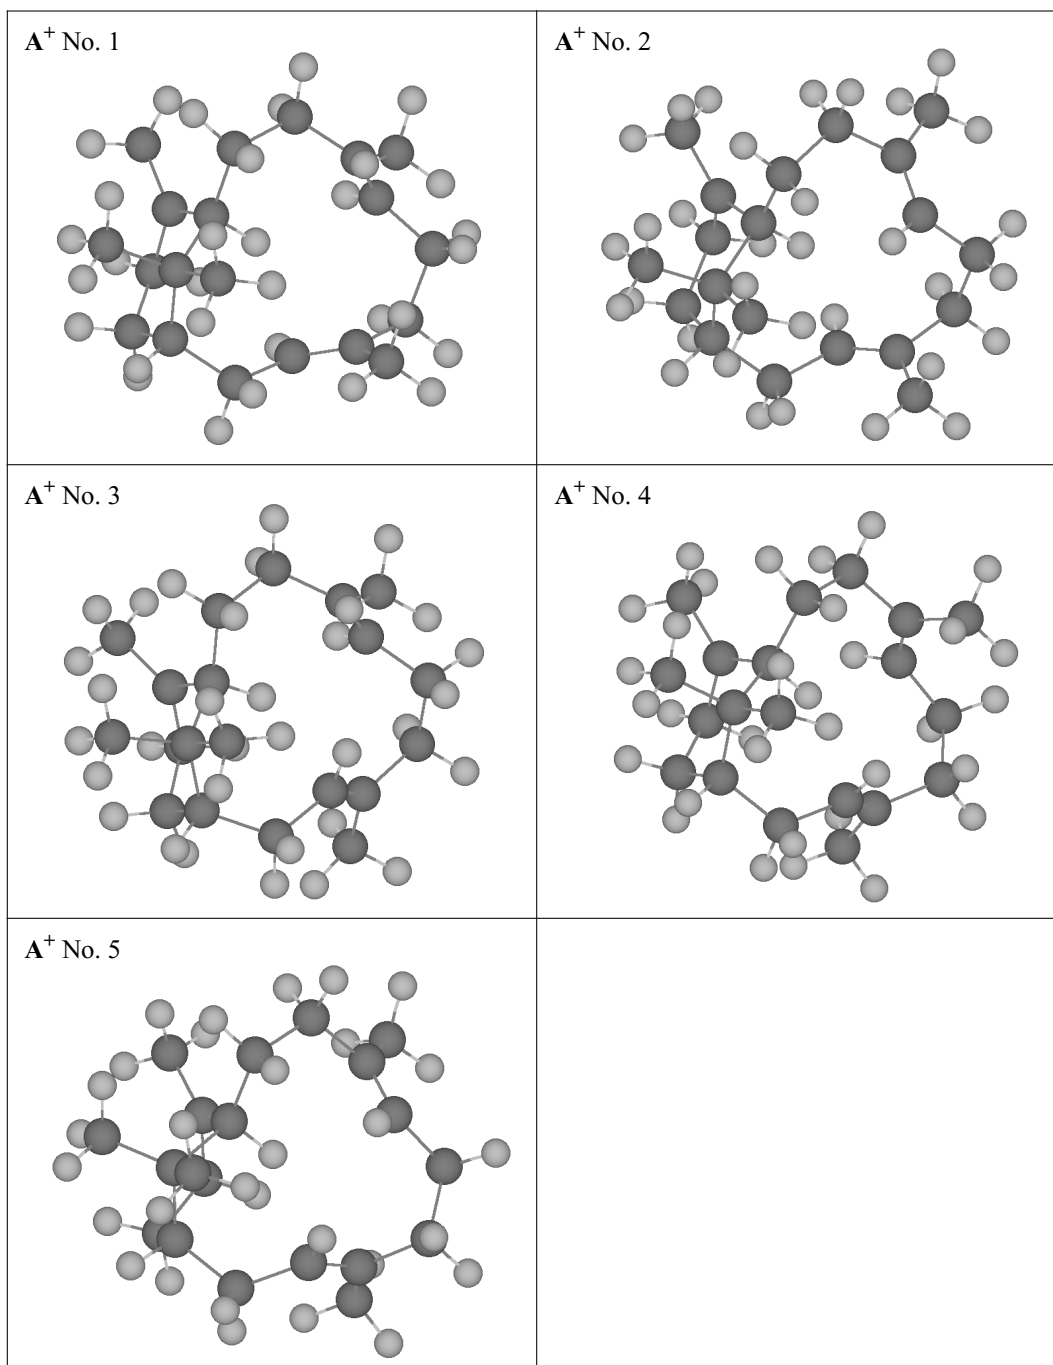

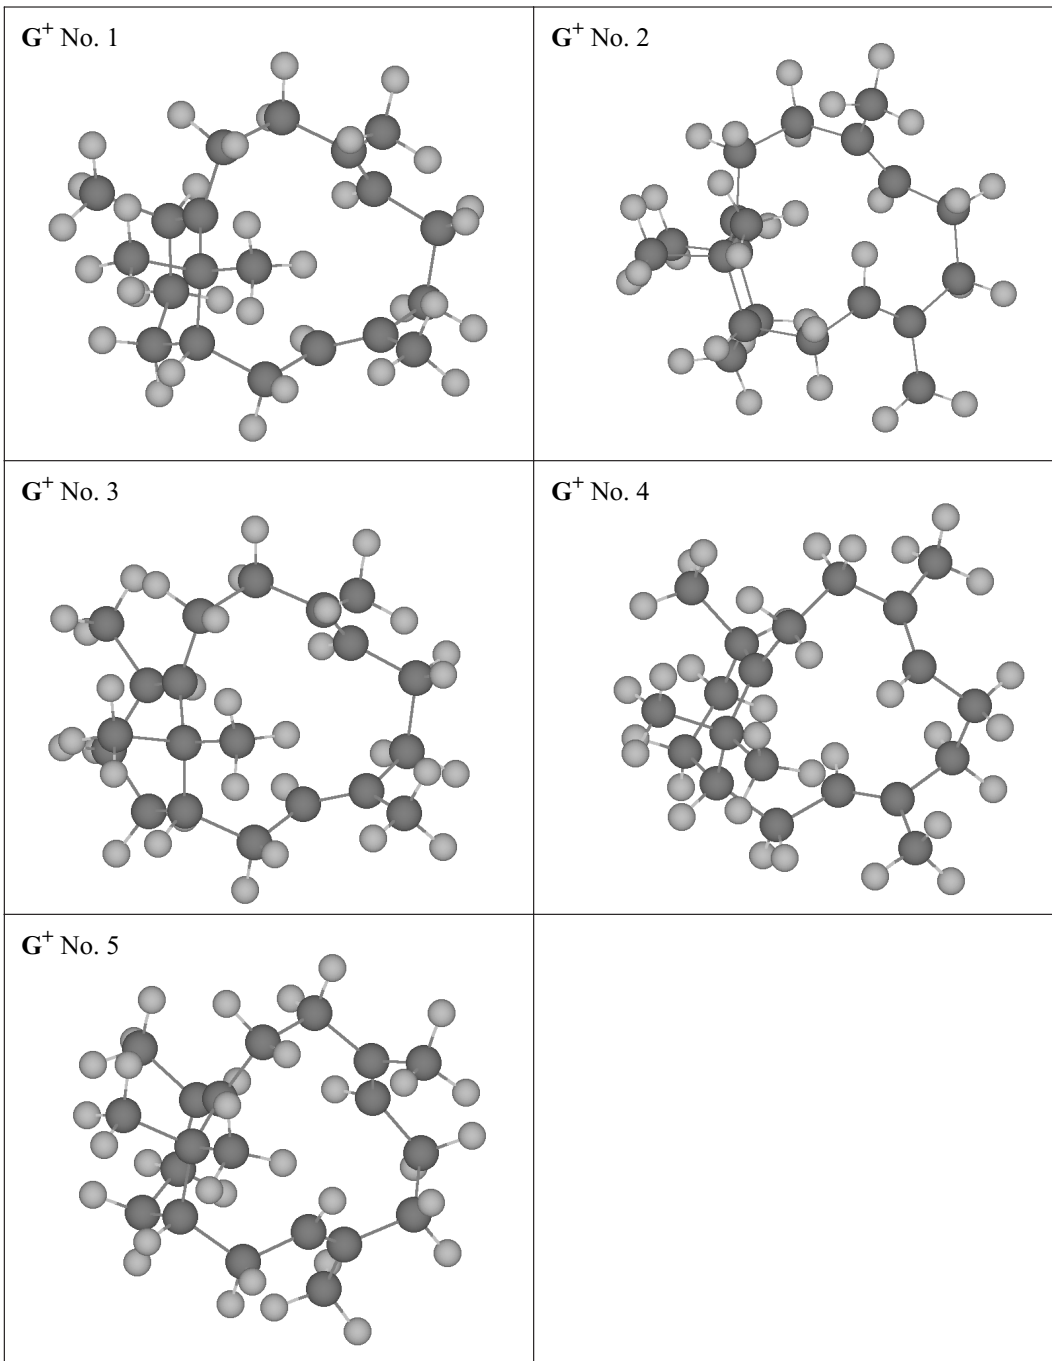

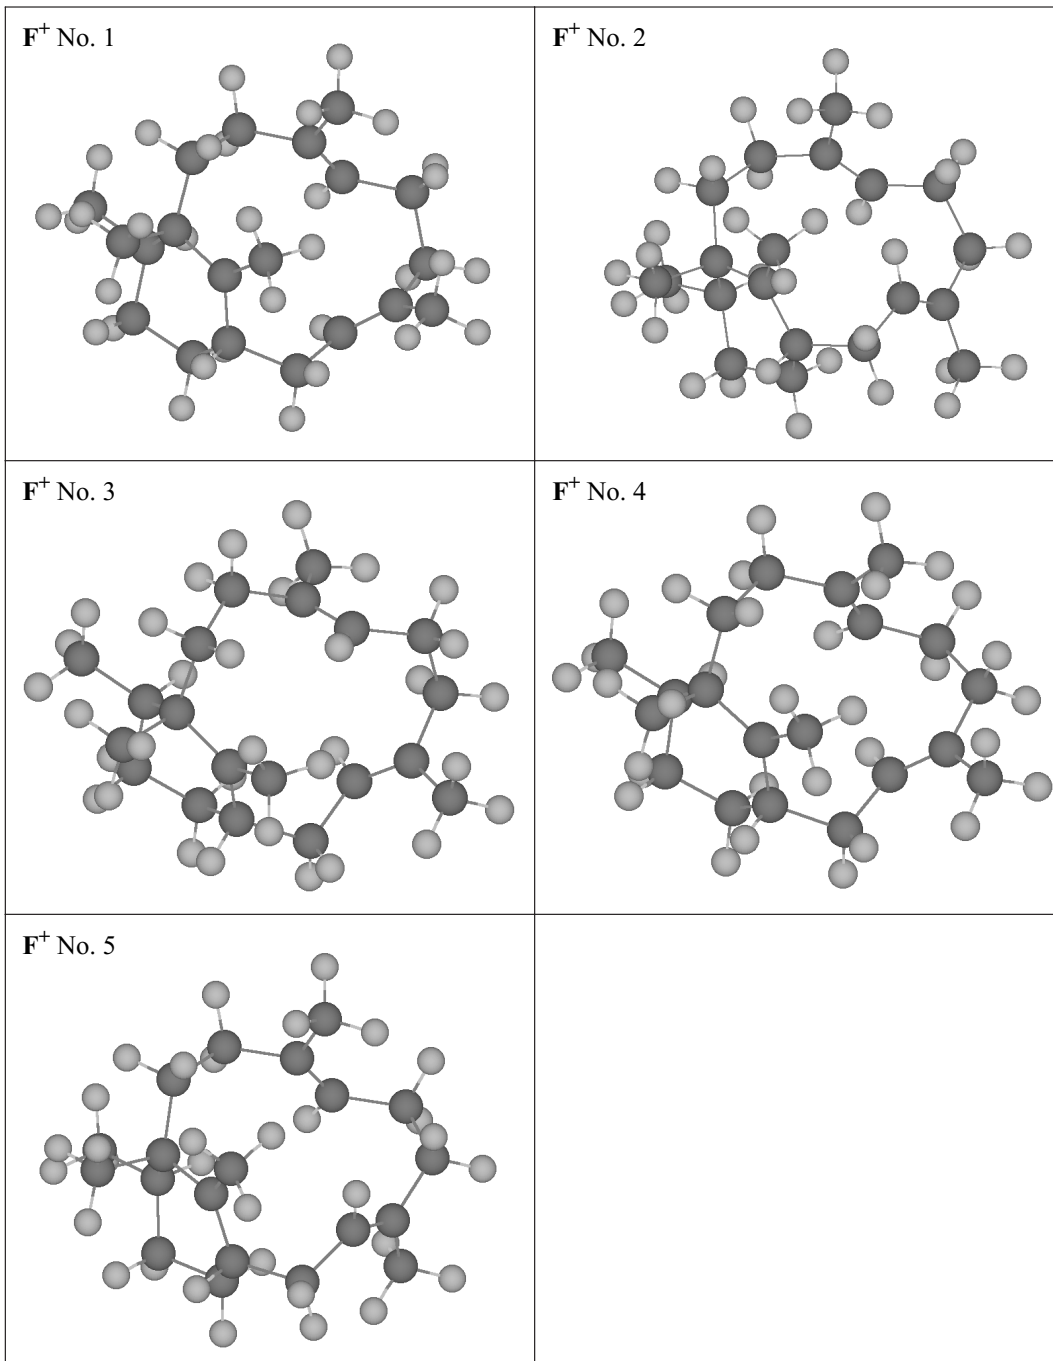

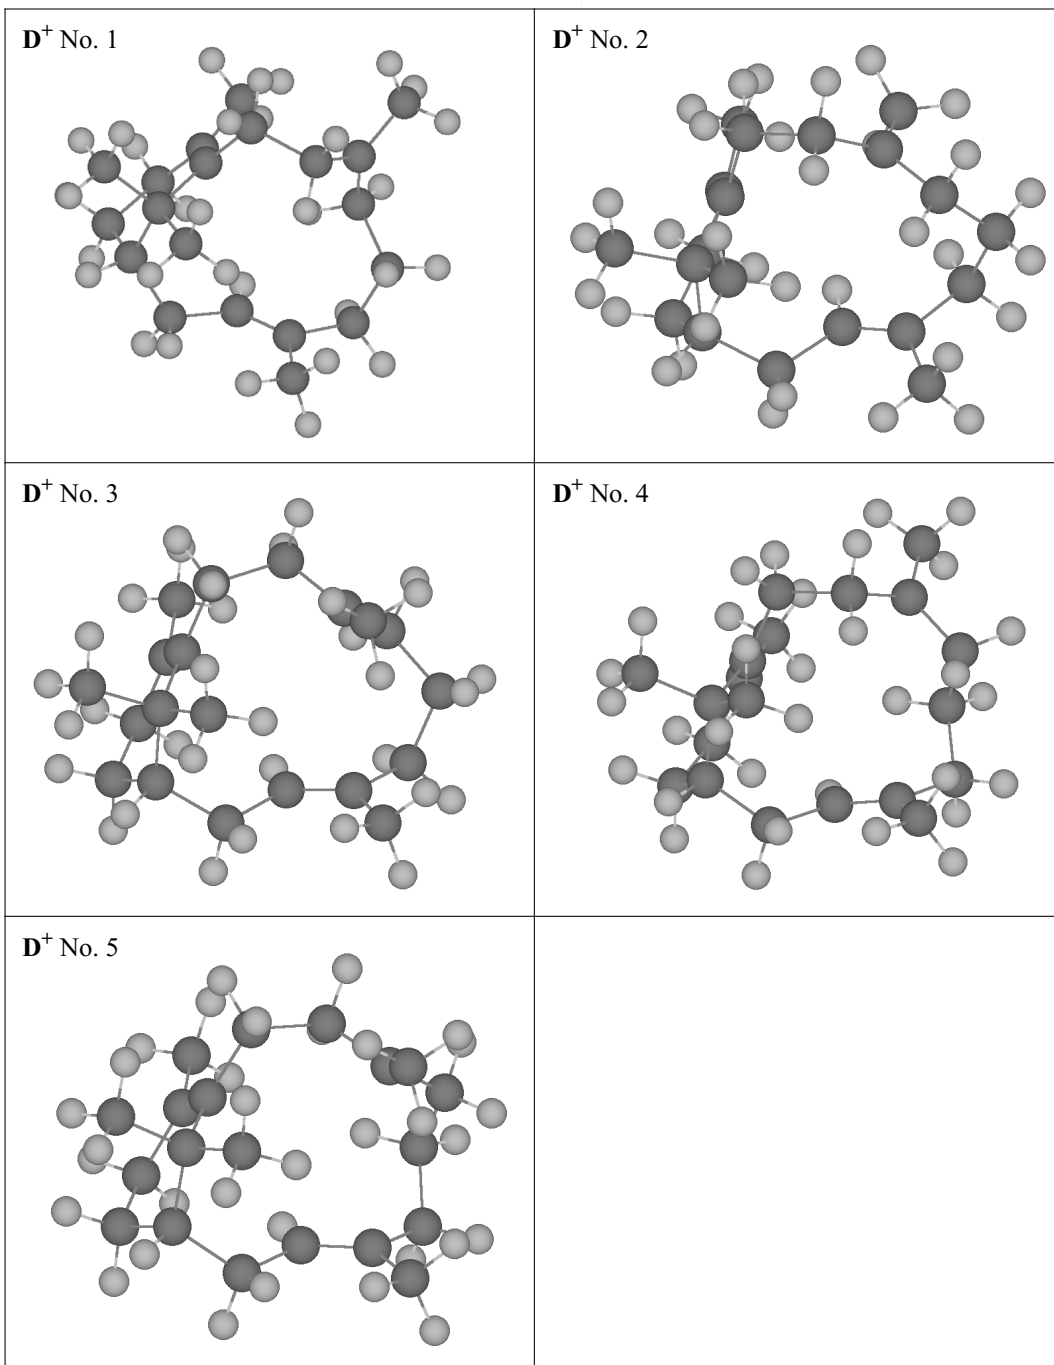

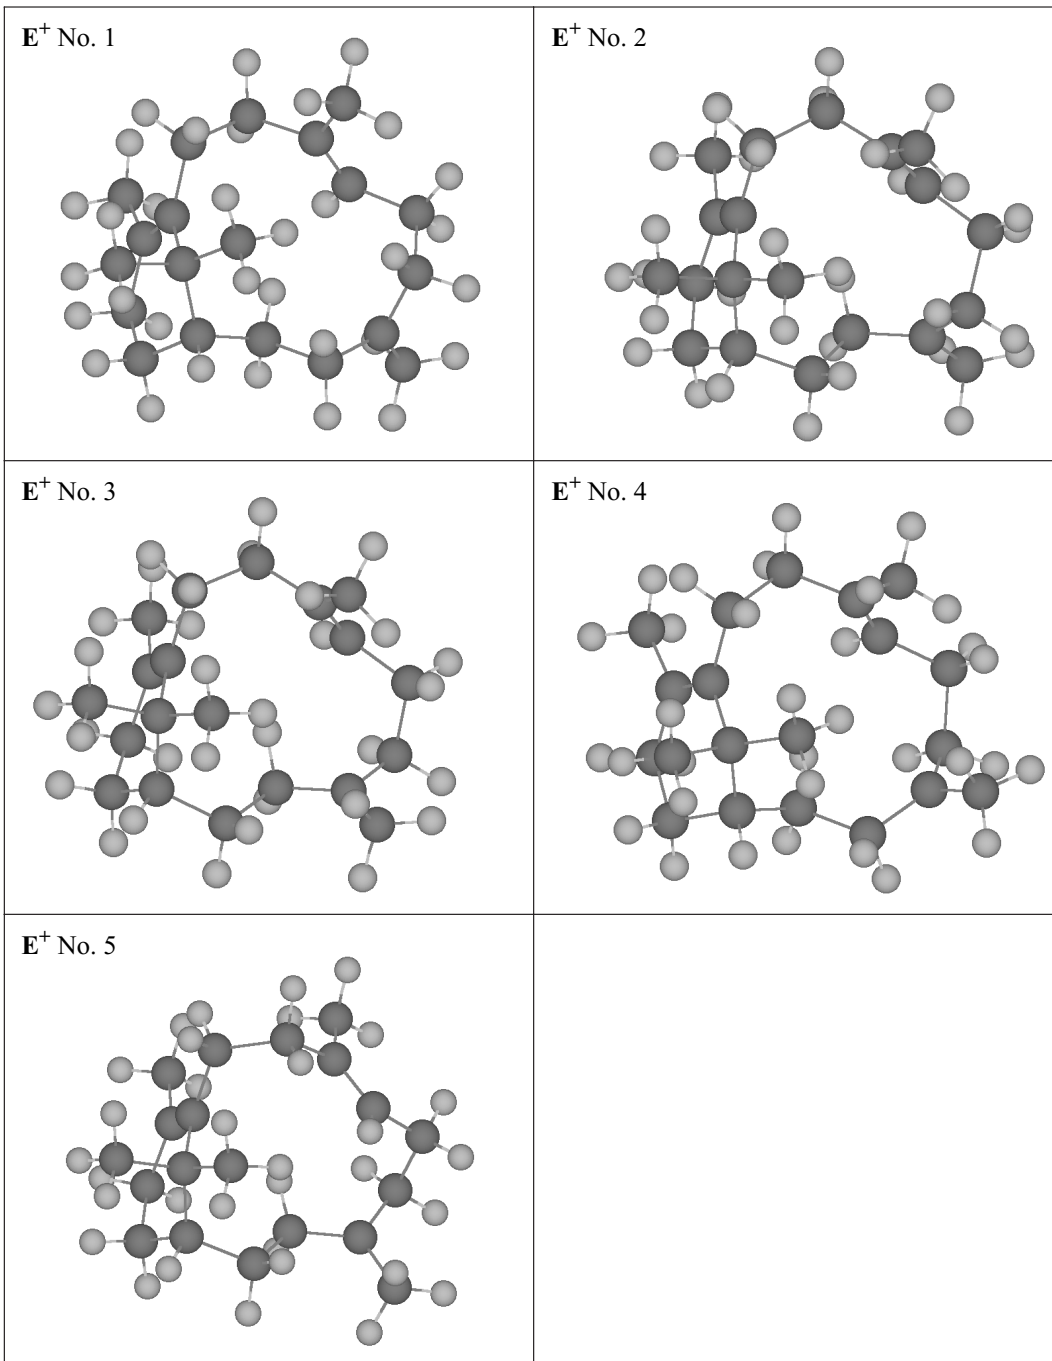



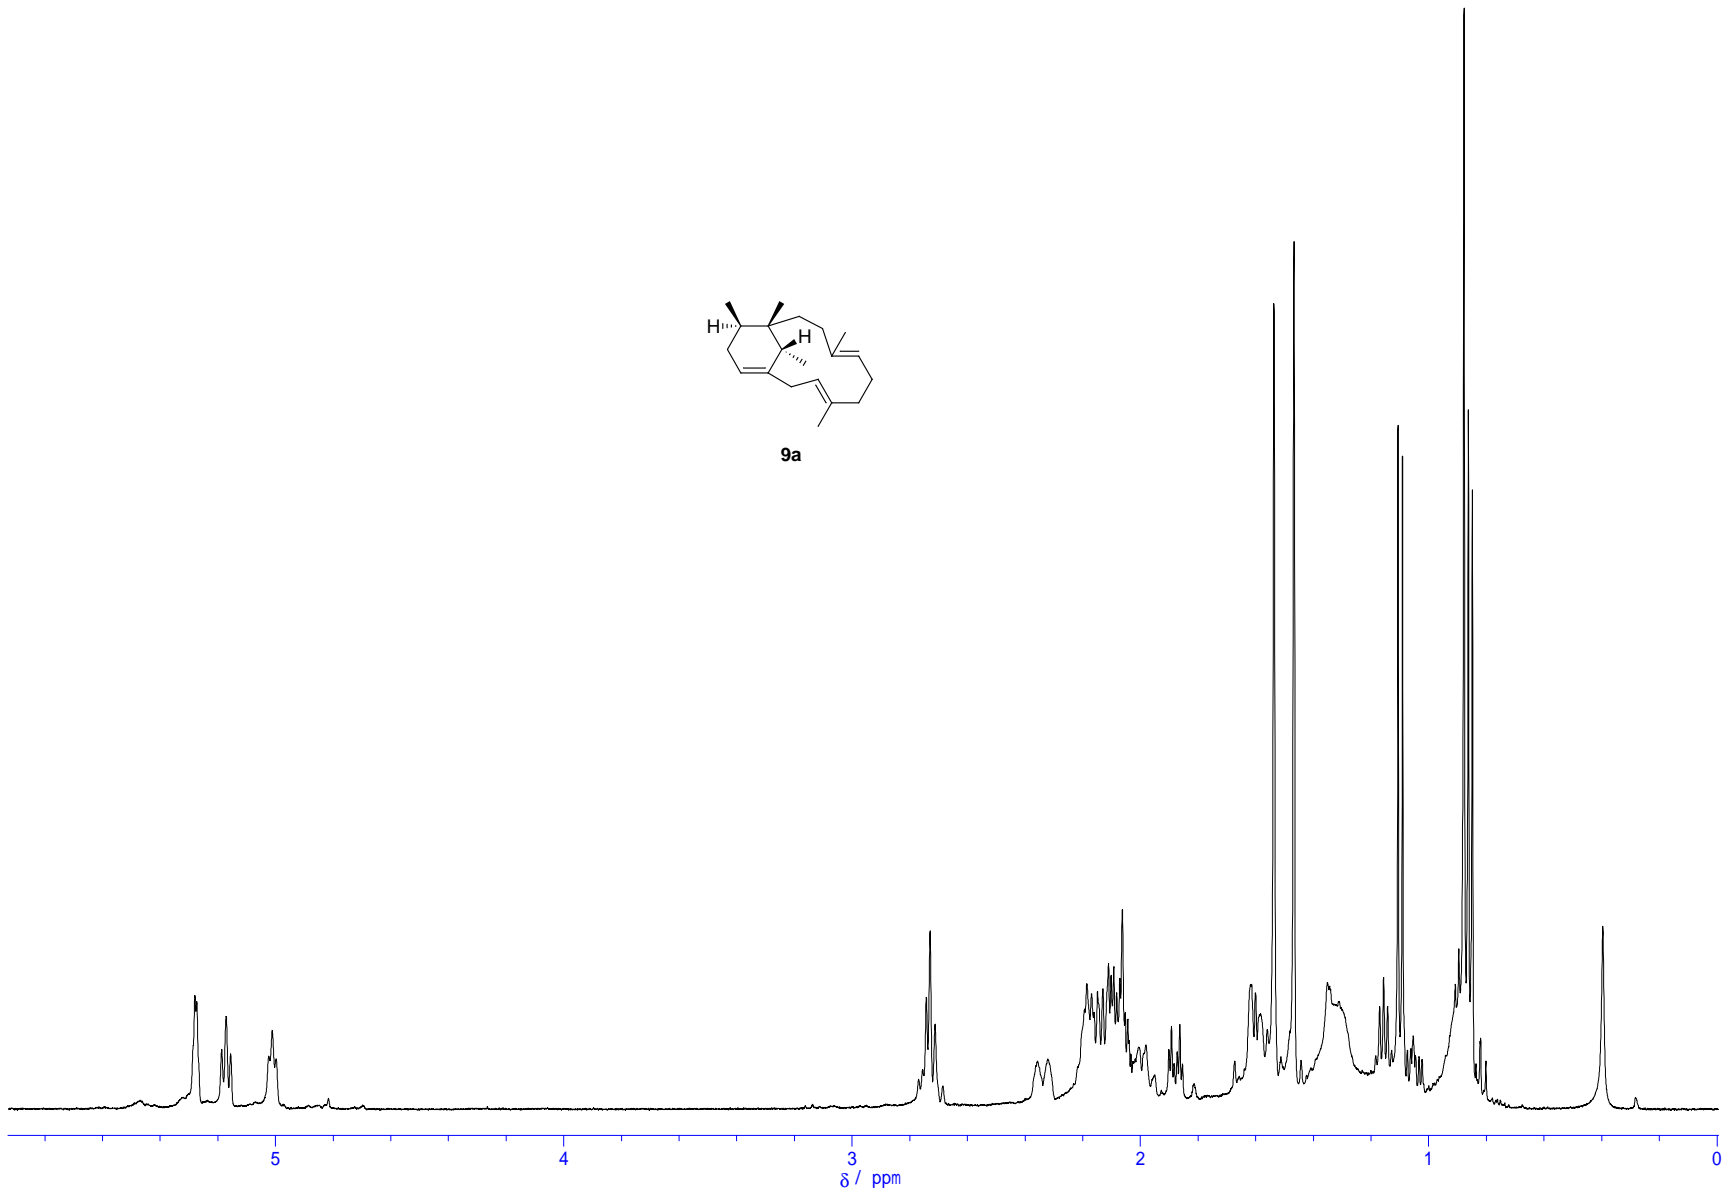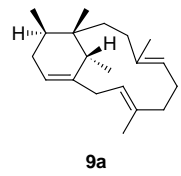

-S10-

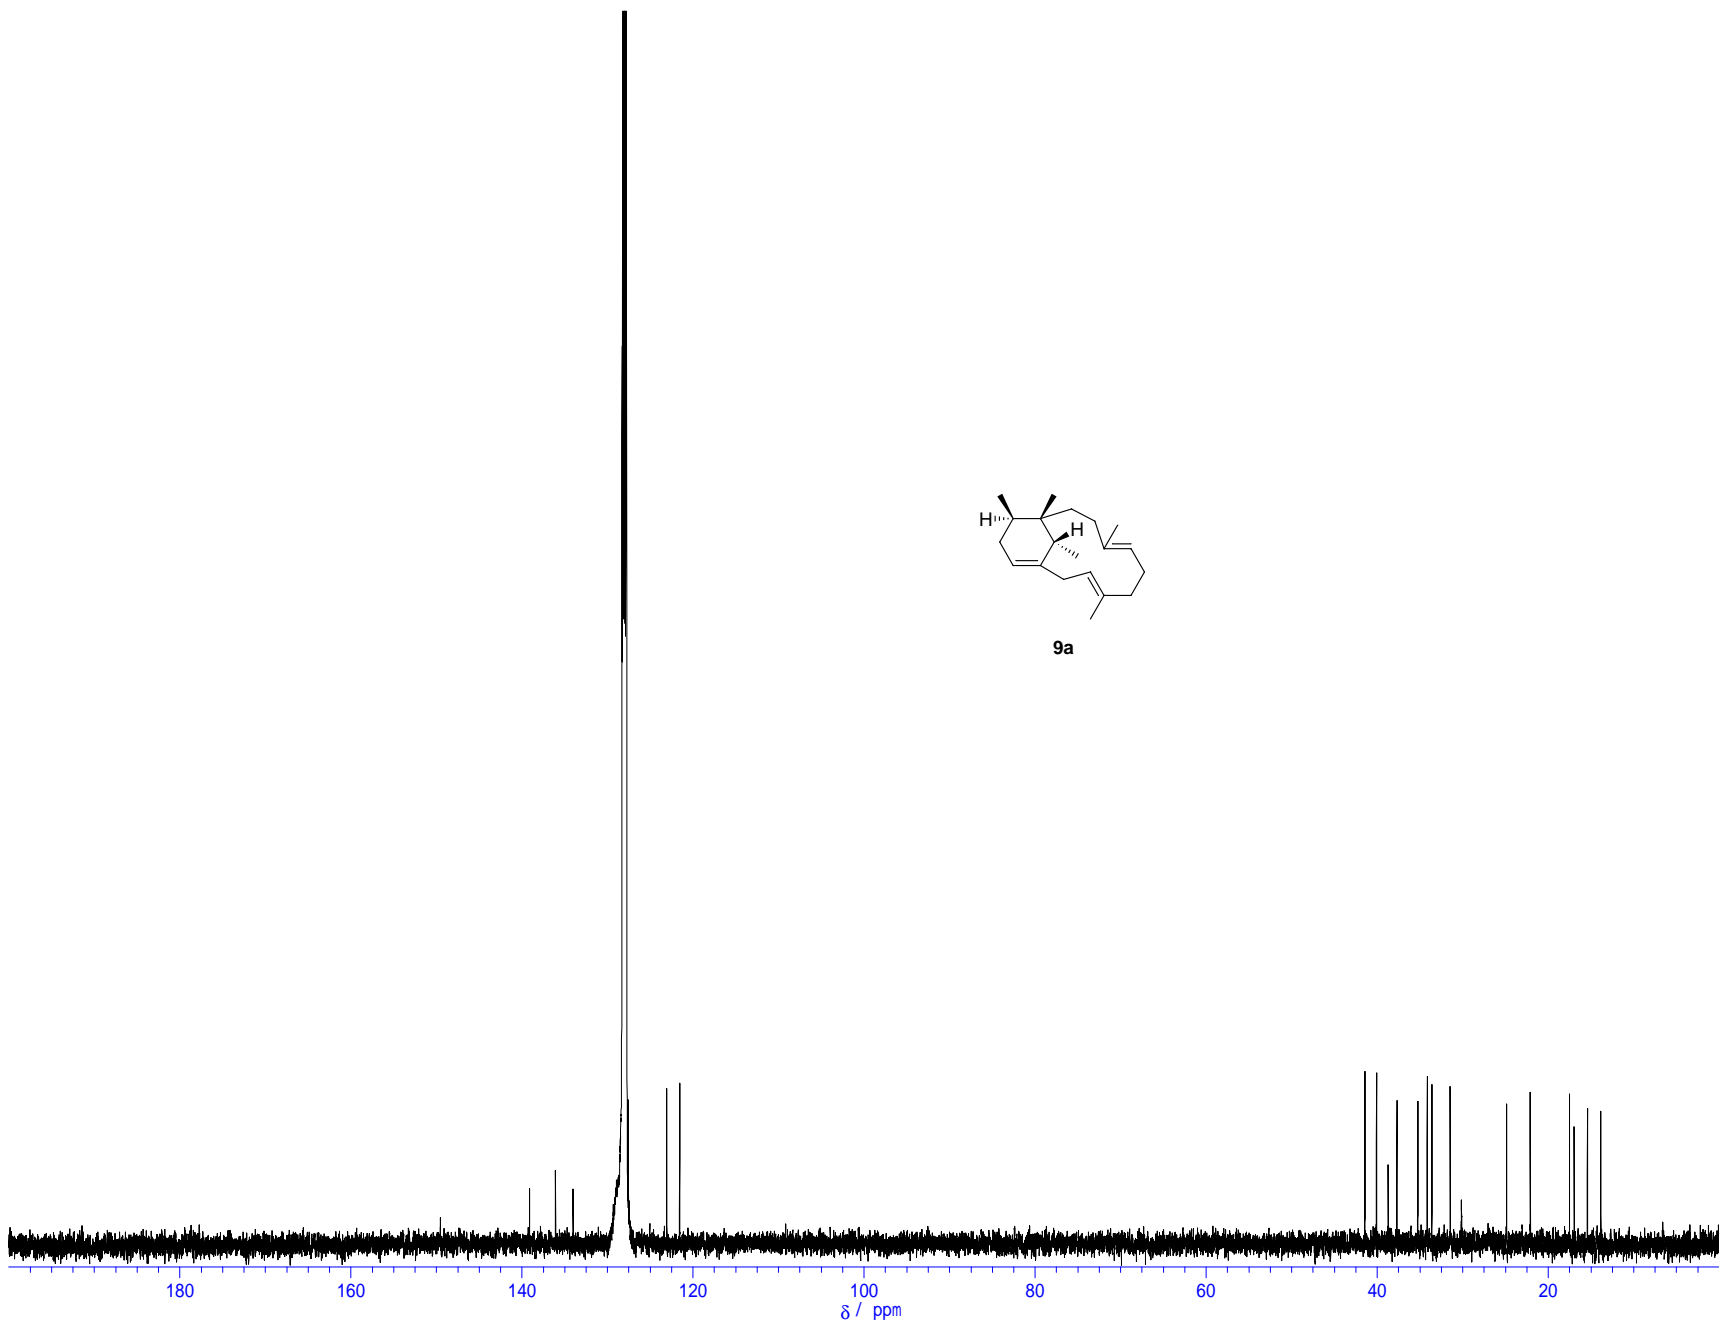

Exp 1.2

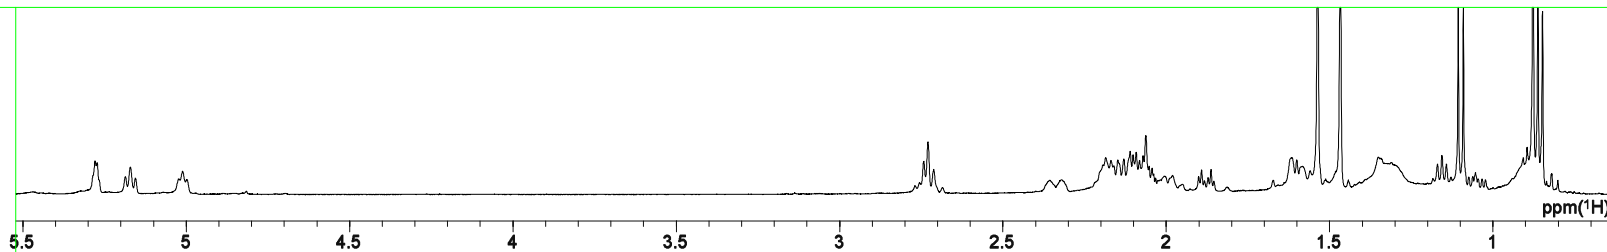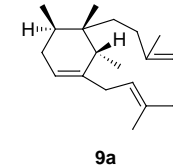

Comment  
File piccpmt/3  
COSY  
Oikawa PMT 1mg /90uL C6D6  
dH(Solv)=7.15ppm, dC(solv)=128.0p  
Bruker AMX-500/ GC-MS & NMR Lab.  
Grad. Sch. Agric., Hokkaido Univ.  
H=piccpmt/1 C=piccpmt/2

\$ F2-Acquisition Parameters

Date Mon Jun 17 16:48:33 2002  
PULPROG cosygs  
TD 1024  
NS 1  
DS 2  
D[0] 0.000003 sec  
D[1] 1.999999 sec  
HL1 5 dB  
IN[0] 0.000218 sec  
P[1] 12.000000 usec  
Sf 9.171891 ppm  
SWH 4587.155963 Hz  
FIDRES 0.223232 Hz  
AQ 0.111616 sec  
RG 4096  
NUCLEUS 1H  
SF01 500.131982 MHz  
BF1 500.130000 MHz  
O1 1982.147592 MHz  
SF02 0.000000 MHz  
BF2 500.130000 MHz  
O2 1982.147592 MHz  
LOKNUC 2H  
SOLVENT C6D6  
PROBHD 2.5 mm DUL 13C-1H-D Z-GR  
TE 300 K  
GRDPROG 2sine  
CNST[21] 10 %  
CNST[22] -10 %  
D[16] 0.000100 sec  
P[16] 1000.000000 usec  
L[21] 100

\$ F1-Acquisition Parameters

TD 256  
ND0 1  
SW 9.171891 ppm  
SWH 4587.155963 Hz  
FIDRES 0.055808 Hz

\$ F2-Processing Parameters

SI 1024  
SF 500.130062538213  
OFFSET 8.424184  
HZpPT 4.479648 Hz  
MC2 qf  
WDW SINE  
SSB 0.000000

\$ F1-Processing Parameters

SI 512  
SF 500.130062538213  
OFFSET 8.424184  
REVERSE yes  
HZpPT 8.959297 Hz  
MC2 qf  
WDW SINE  
SSB 0.000000  
expt = ca. 9 min

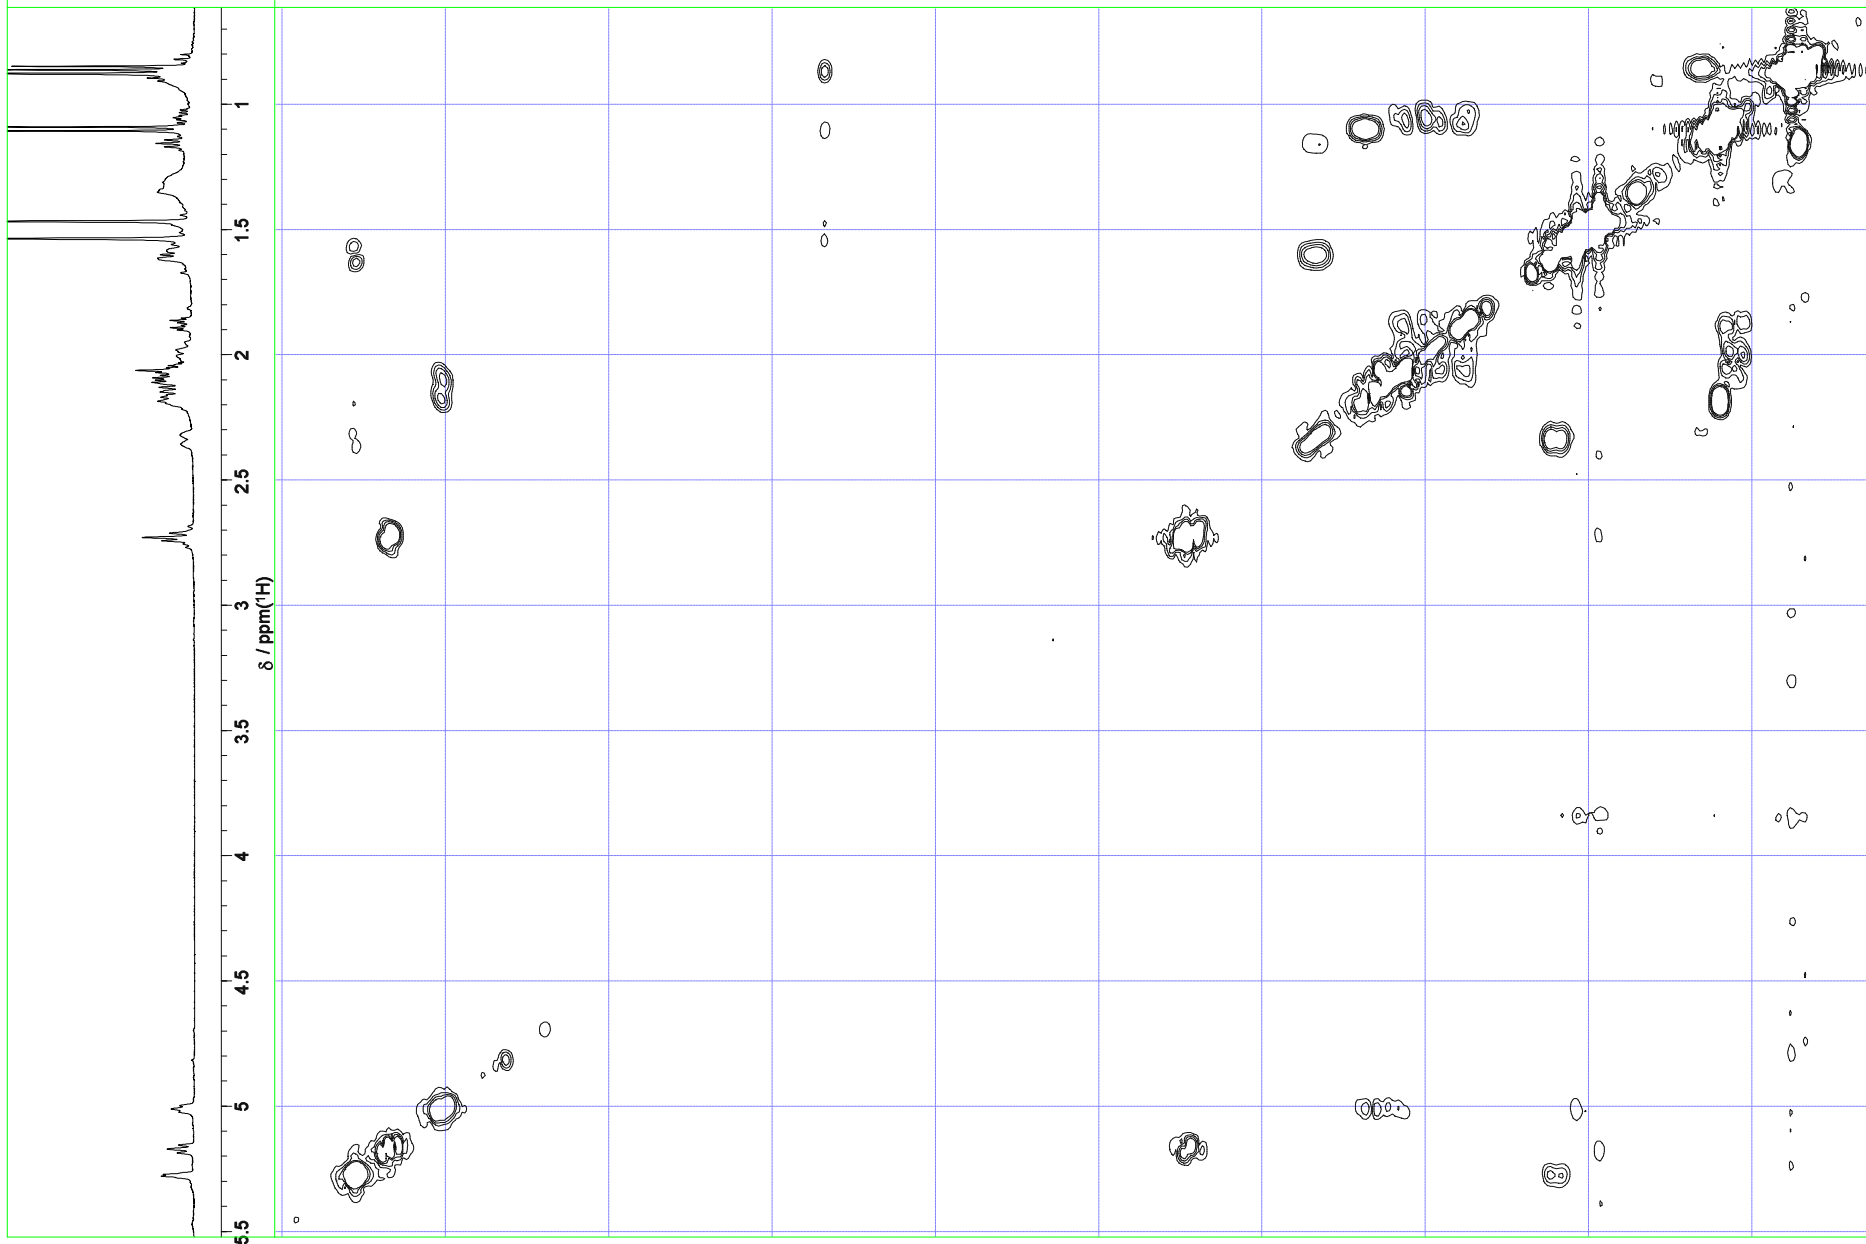

Exp 1.2

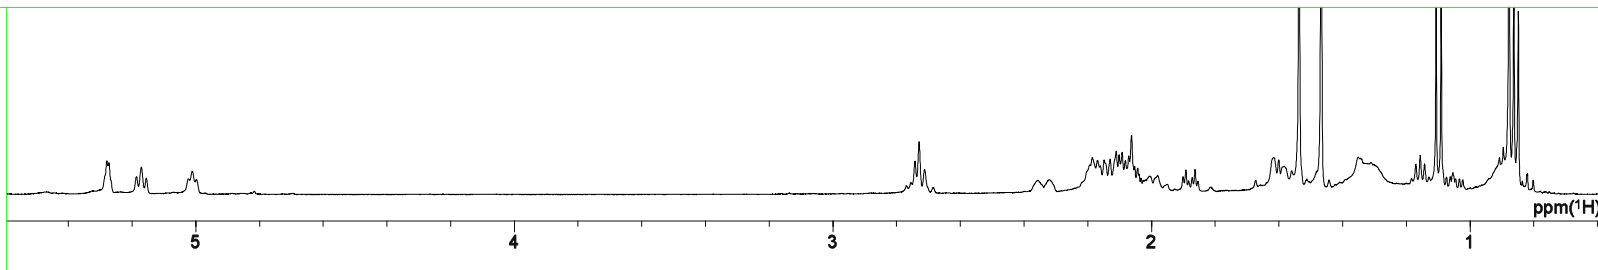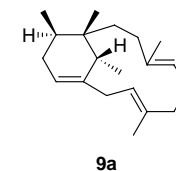

Comment  
File piccpmt/4  
noesy  
Oikawa PMT 1mg /90uL C6D6  
dH(Solv)=7.15ppm, dC(solv)=128.0p  
Bruker AMX-500/ GC-MS & NMR Lab.  
Grad. Sch. Agric., Hokkaido Univ.  
H=piccpmt/1 C=piccpmt/2

\$ F2-Acquisition Parameters  
Date Mon Jun 17 16:59:41 2002  
PULPROG noesygs.jp  
TD 1024  
NS 16  
DS 4  
D[0] 0.000003 sec  
D[1] 2.002048 sec  
D[9] 1.000000 sec  
HL1 5 dB  
IN[0] 0.000109 sec  
P[1] 12.000000 usec  
V9 2.000000 %  
SW 9.171891 ppm  
SI 4587.155963 Hz  
FIDRES 0.223232 Hz  
AQ 0.111616 sec  
RG 2048  
NUCLEUS 1H  
SF01 500.131982 MHz  
BF1 500.130000 MHz  
O1 1982.147592 MHz  
SF02 0.000000 MHz  
BF2 500.130000 MHz  
O2 1982.147592 MHz  
LOKNUC 2H  
SOLVENT C6D6  
PROBHD 2.5 mm DUL 13C-1H-D Z-GR  
TE 300 K  
GRDPROG 1sine  
CNST[21] 30 %  
D[16] 0.000100 sec  
P[16] 1000.000000 usec  
L[21] 100

\$ F1-Acquisition Parameters  
TD 256  
ND0 2  
SW 9.171891 ppm  
SI 4587.155963 Hz  
FIDRES 0.055808 Hz

\$ F2-Processing Parameters  
SI 512  
SF 500.130062538213  
OFFSET 8.424184  
HZpPT 8.959297 Hz  
MC2 qf  
WDW QSINE  
SSB 2.000000  
PH\_mod pk  
PHC0 35.422300 degree  
PHC1 25.800010 degree

\$ F1-Processing Parameters  
SI 512  
SF 500.130062538213  
OFFSET 8.424184  
REVERSE no  
HZpPT 8.959297 Hz  
MC2 TPP1  
WDW QSINE  
SSB 2.000000  
PH\_mod pk  
PHC0 15.443750 degree  
PHC1 -29.200000 degree  
expt = ca. 4 hr

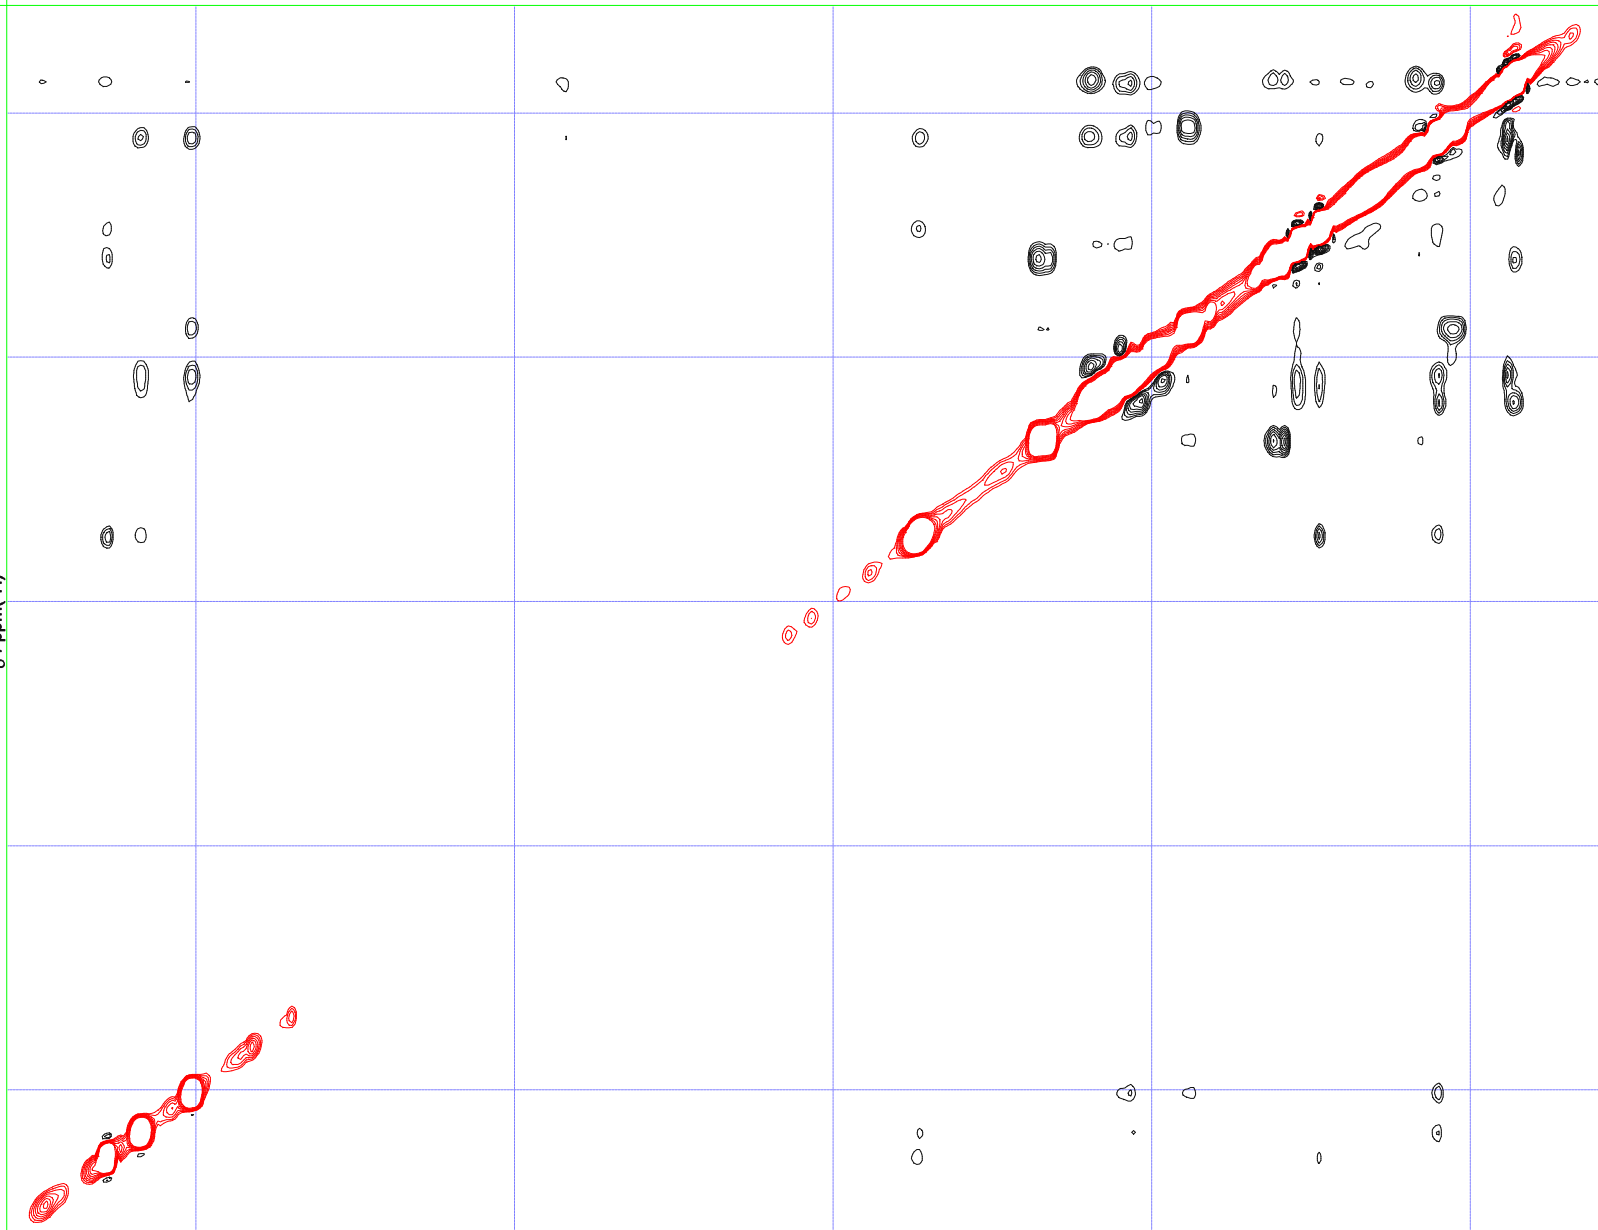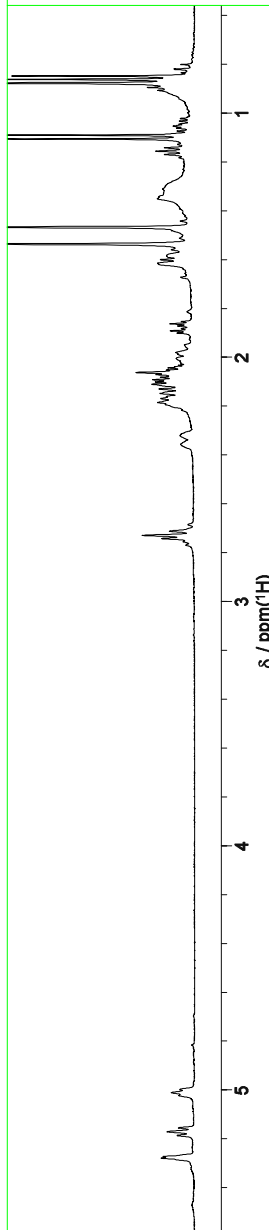

Exp 1.2

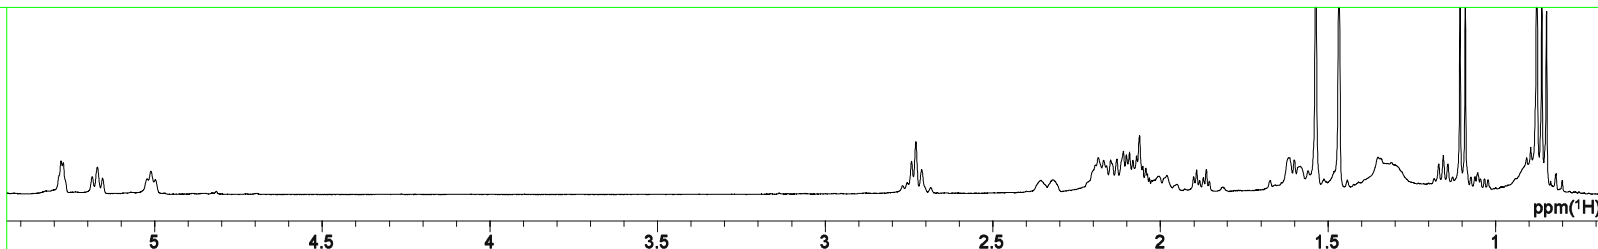

Comment  
File piccpmt/7  
hsqc  
Oikawa PMT 1mg /90uL C6D6  
dH(Solv)=7.15ppm, dC(sol)=128.0p  
Bruker AMX-500/ GC-MS & NMR Lab.  
Grad. Sch. Agric., Hokkaido Univ.  
Hpiccpmt/1 C=piccpmt/2

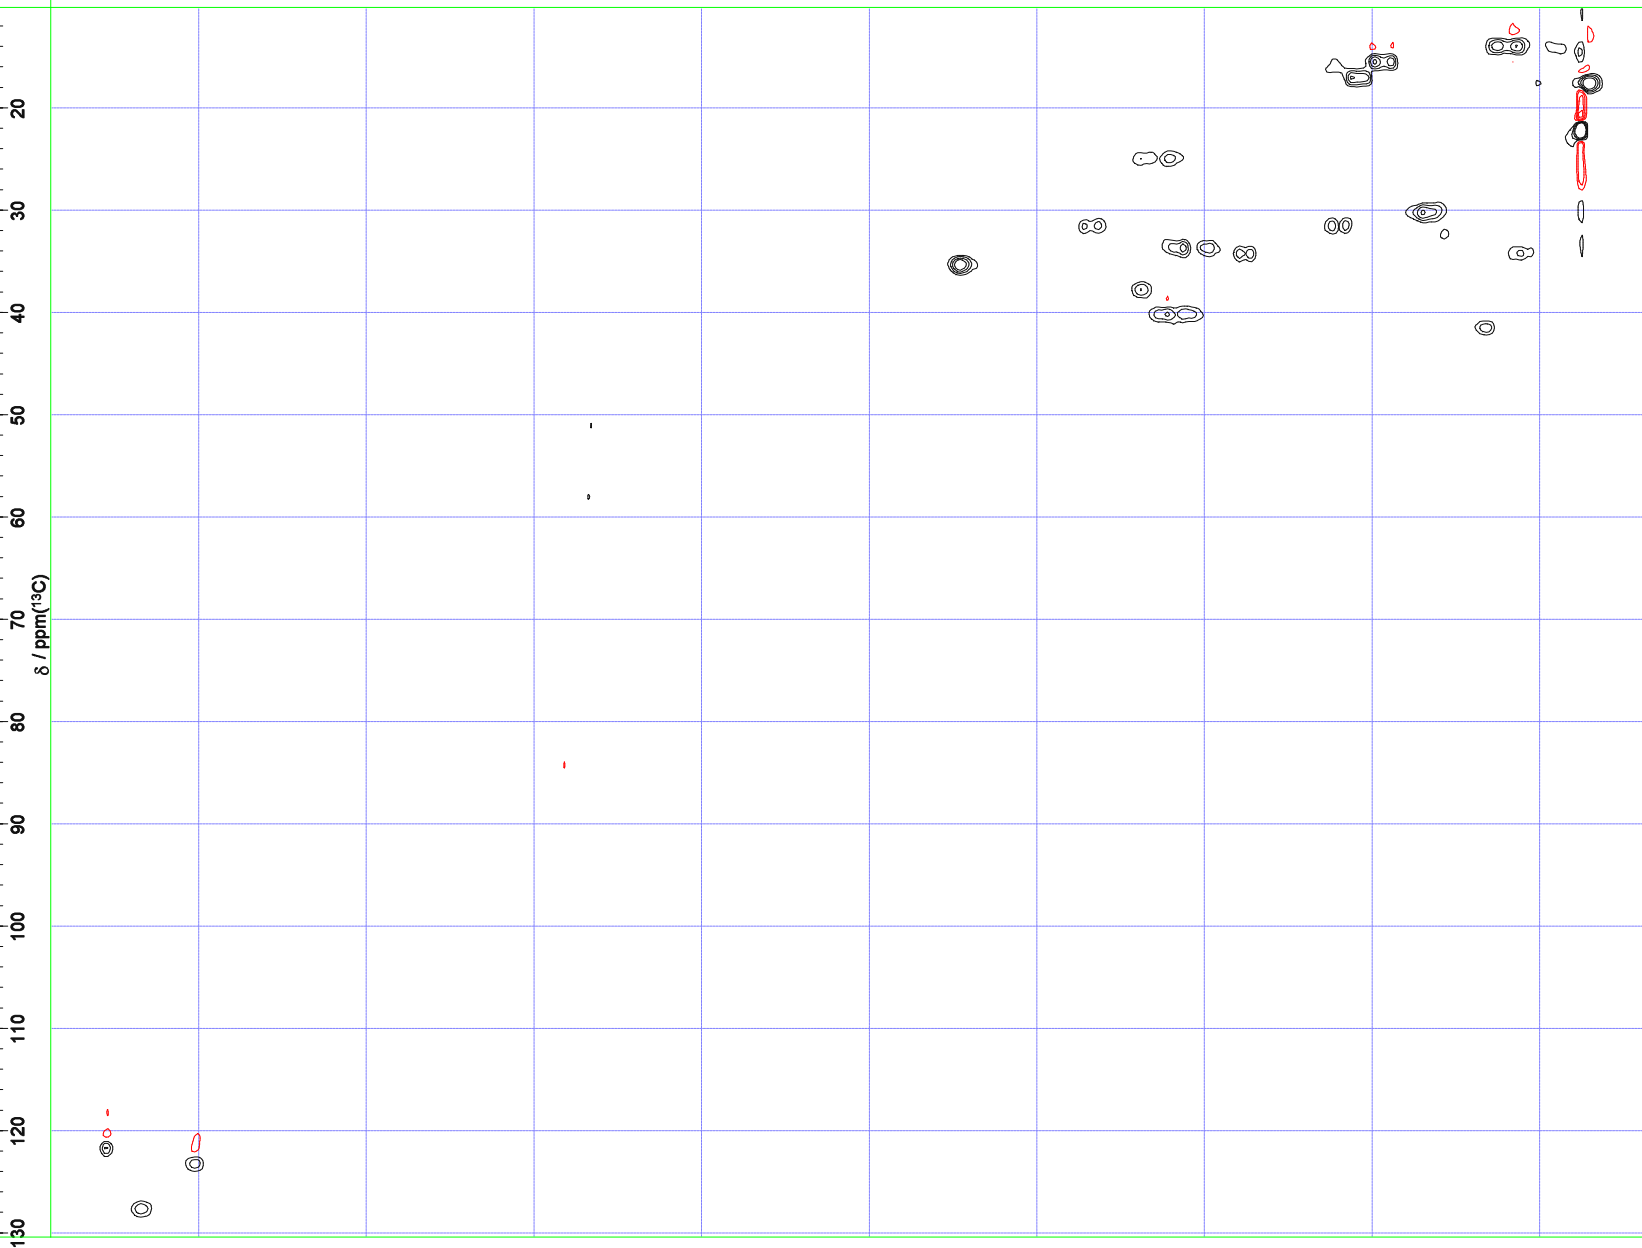

\$ F2-Acquisition Parameters  
Date Thu Jun 20 15:38:53 2002  
PULPROG invg1stp.m  
TD 1024  
NS 96  
DS 2  
D[0] 0.000003 sec  
D[1] 2.181247 sec  
D[4] 0.001800 sec  
DL[0] 19 dB  
DL[5] 41 dB  
HL1 5 dB  
IN[0] 0.000013 sec  
P[1] 12.000000 usec  
P[3] 5.800000 usec  
P[31] 0.000000 usec  
SI 9.171891 ppm  
SWH 4587.155963 Hz  
FIDRES 0.223232 Hz  
AQ 0.111616 sec  
RG 32768  
NUCLEUS 1H  
SF01 500.131982 MHz  
BF1 500.130000 MHz  
O1 1982.147592 MHz  
SF02 125.768146 MHz  
BF2 125.757739 MHz  
O2 10407.375084 MHz  
LOKNUC 2H  
SOLVENT C6D6  
PROBHD 2.5 mm DUL 13C-1H-D Z-GR  
TE 300 K  
GRDPROG 3sine  
CNST[21] 40 %  
CNST[22] 15 %  
CNST[23] 10 %  
D[16] 0.000000 sec  
P[16] 1000.000000 usec  
L[21] 100  
\$ F1-Acquisition Parameters  
TD 256  
ND0 4  
SW 159.022778 ppm  
SWH 20000.000000 Hz  
FIDRES 0.012800 Hz  
\$ F2-Processing Parameters  
SI 1024  
SF 500.130062538213  
OFFSET 8.424184  
HZpPT 4.479648 Hz  
MC2 cf  
WDW QSINE  
SSB 2.000000  
PH\_mod pk  
PHC0 -100.325000 degree  
PHC1 -25.600000 degree  
\$ F1-Processing Parameters  
SI 512  
SF 125.757762832763  
OFFSET 162.0858  
REVERSE no  
HZpPT 39.062500 Hz  
MC2 TPP1  
WDW QSINE  
SSB 2.000000  
PH\_mod pk  
PHC0 289.530900 degree  
PHC1 -253.800000 degree  
expt = ca. 16 hr

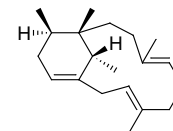

9a

Exp 1.2

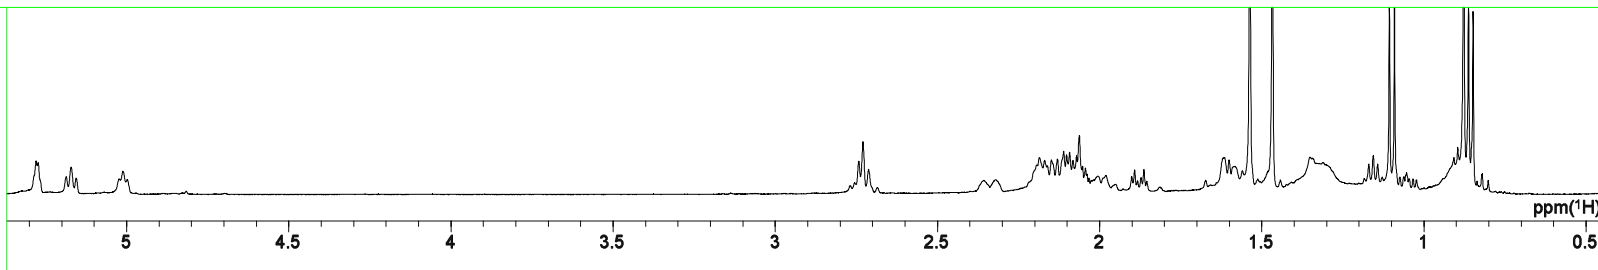

Comment  
File piccpmt/6

HMC  
Oikawa PMT 1mg /90uL C6D6  
dH(Solv)=7.15ppm, dC(solV)=128.0p  
Bruker AMX-500/ GC-MS & NMR Lab.  
Grad. Sch. Agric., Hokkaido Univ.  
H=piccpmt/1 C=piccpmt/2

\$ F2-Acquisition Parameters  
Date Tue Jun 18 02:02:20 2002  
PULPROG inv4gsplrnd.jp  
TD 1024  
NS 192  
DS 2  
D[0] 0.000003 sec  
D[1] 2.000000 sec  
D[2] 0.003450 sec  
D[6] 0.070000 sec  
DL[0] 19 dB  
HL1 5 dB  
IN[0] 0.000025 sec  
P[1] 12.000000 usec  
P[3] 5.800000 usec  
SI 9.171691 ppm  
SWH 4587.155963 Hz  
FIDRES 0.223232 Hz  
AQ 0.111616 sec  
RG 32768  
NUCLEUS 1H  
SF01 500.131982 MHz  
BF1 500.130000 MHz  
O1 1982.147592 MHz  
SF02 125.768146 MHz  
BF2 125.757739 MHz  
O2 10407.375084 MHz  
LOKNUC 2H  
SOLVENT C6D6  
PROBHD 2.5 mm DUL 13C-1H-D Z-GR  
TE 300 K  
GRDPROG 3sine  
CNST[21] 10 %  
CNST[22] 10 %  
CNST[23] 5 %  
D[16] 0.000000 sec  
P[16] 1000.000000 usec  
L[21] 100  
\$ F1-Acquisition Parameters  
TD 256  
ND0 2  
SW 159.022778 ppm  
SWH 20000.000000 Hz  
FIDRES 0.012800 Hz  
\$ F2-Processing Parameters  
SI 1024  
SF 500.130062538213  
OFFSET 8.424184  
HZpPT 4.479648 Hz  
MC2 qf  
WDW GM  
GB 0.300000  
LB -10.000000  
\$ F1-Processing Parameters  
SI 512  
SF 125.757762832763  
OFFSET 162.0858  
REVERSE no  
HZpPT 39.062500 Hz  
MC2 qf  
WDW QSINE  
SSB 6.000000  
expt = ca. 29 hr

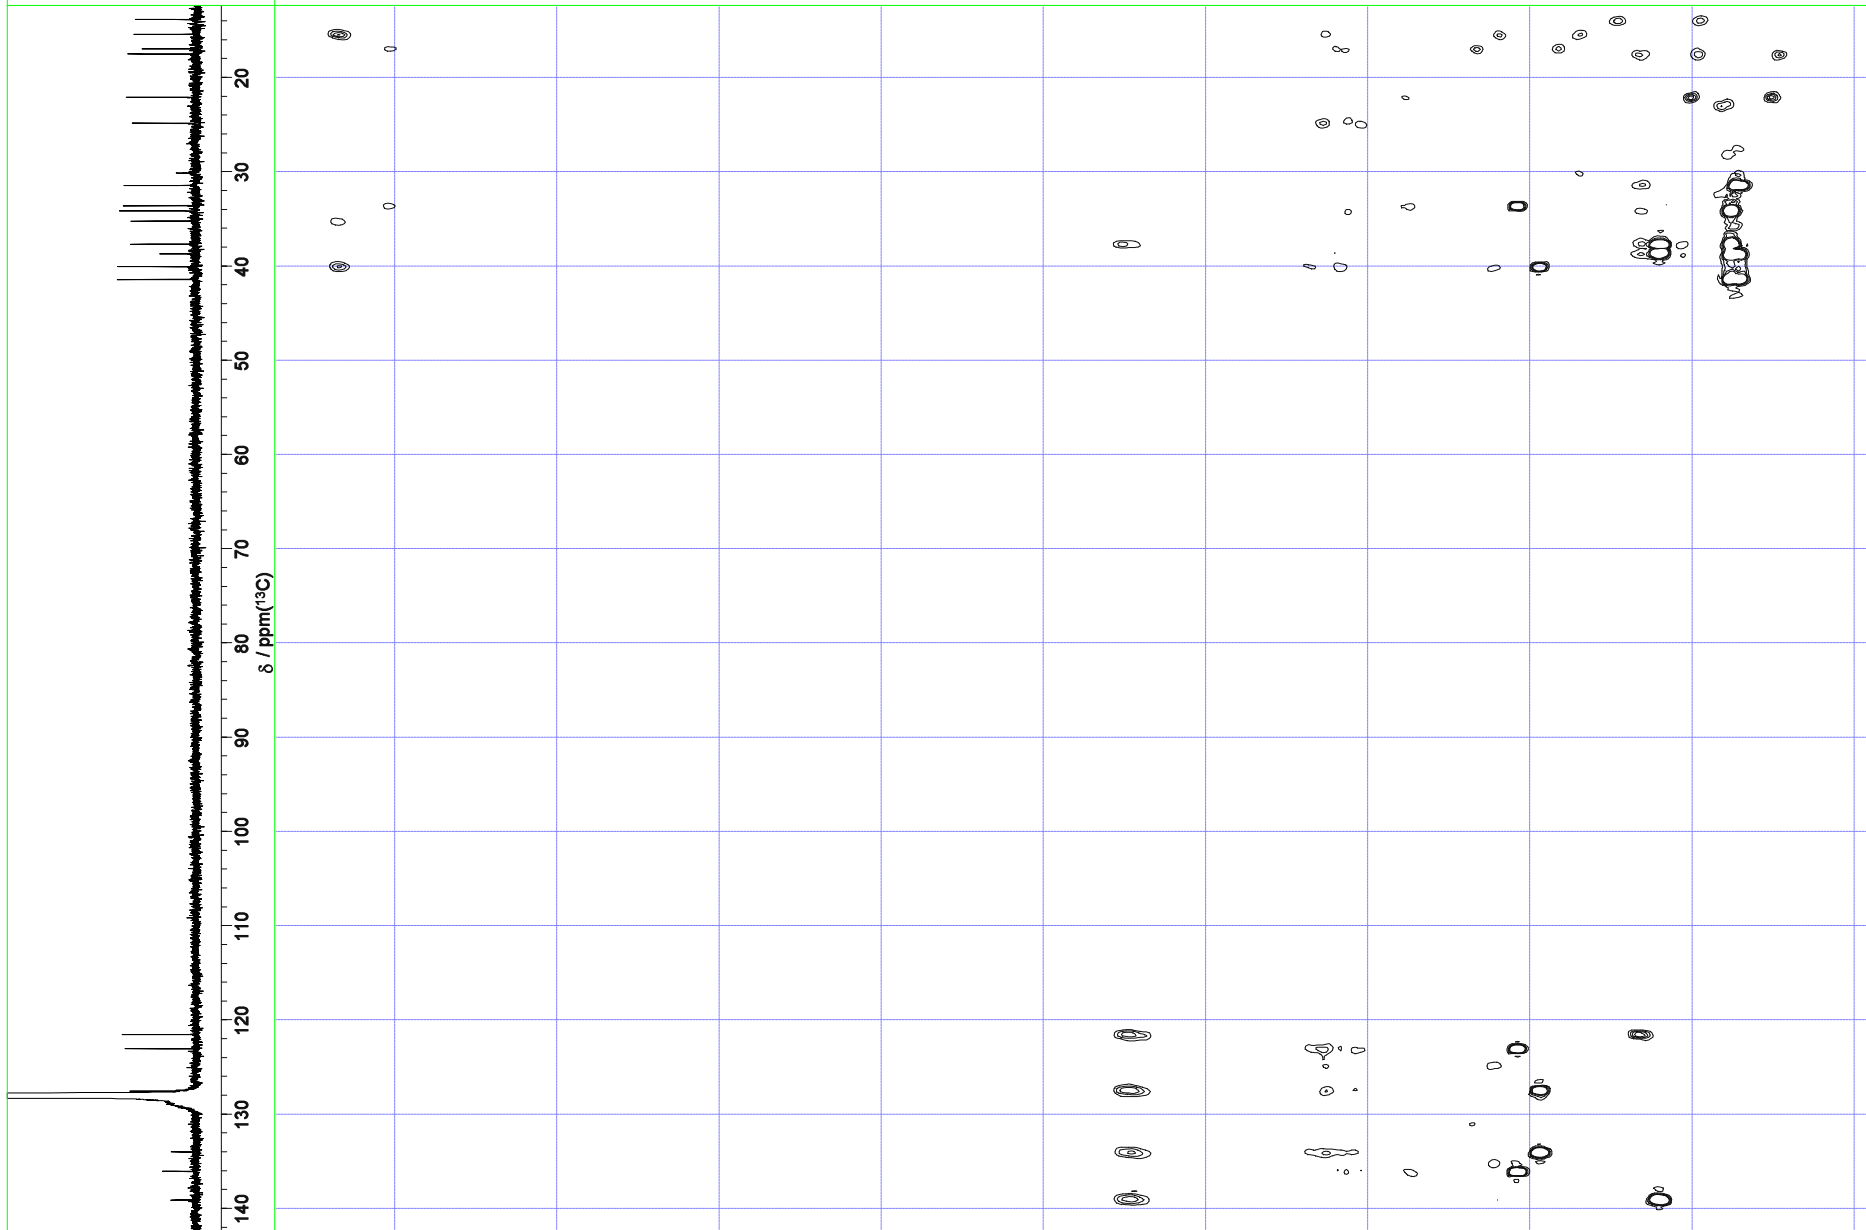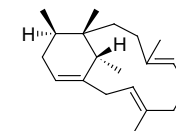

9a

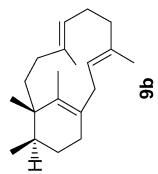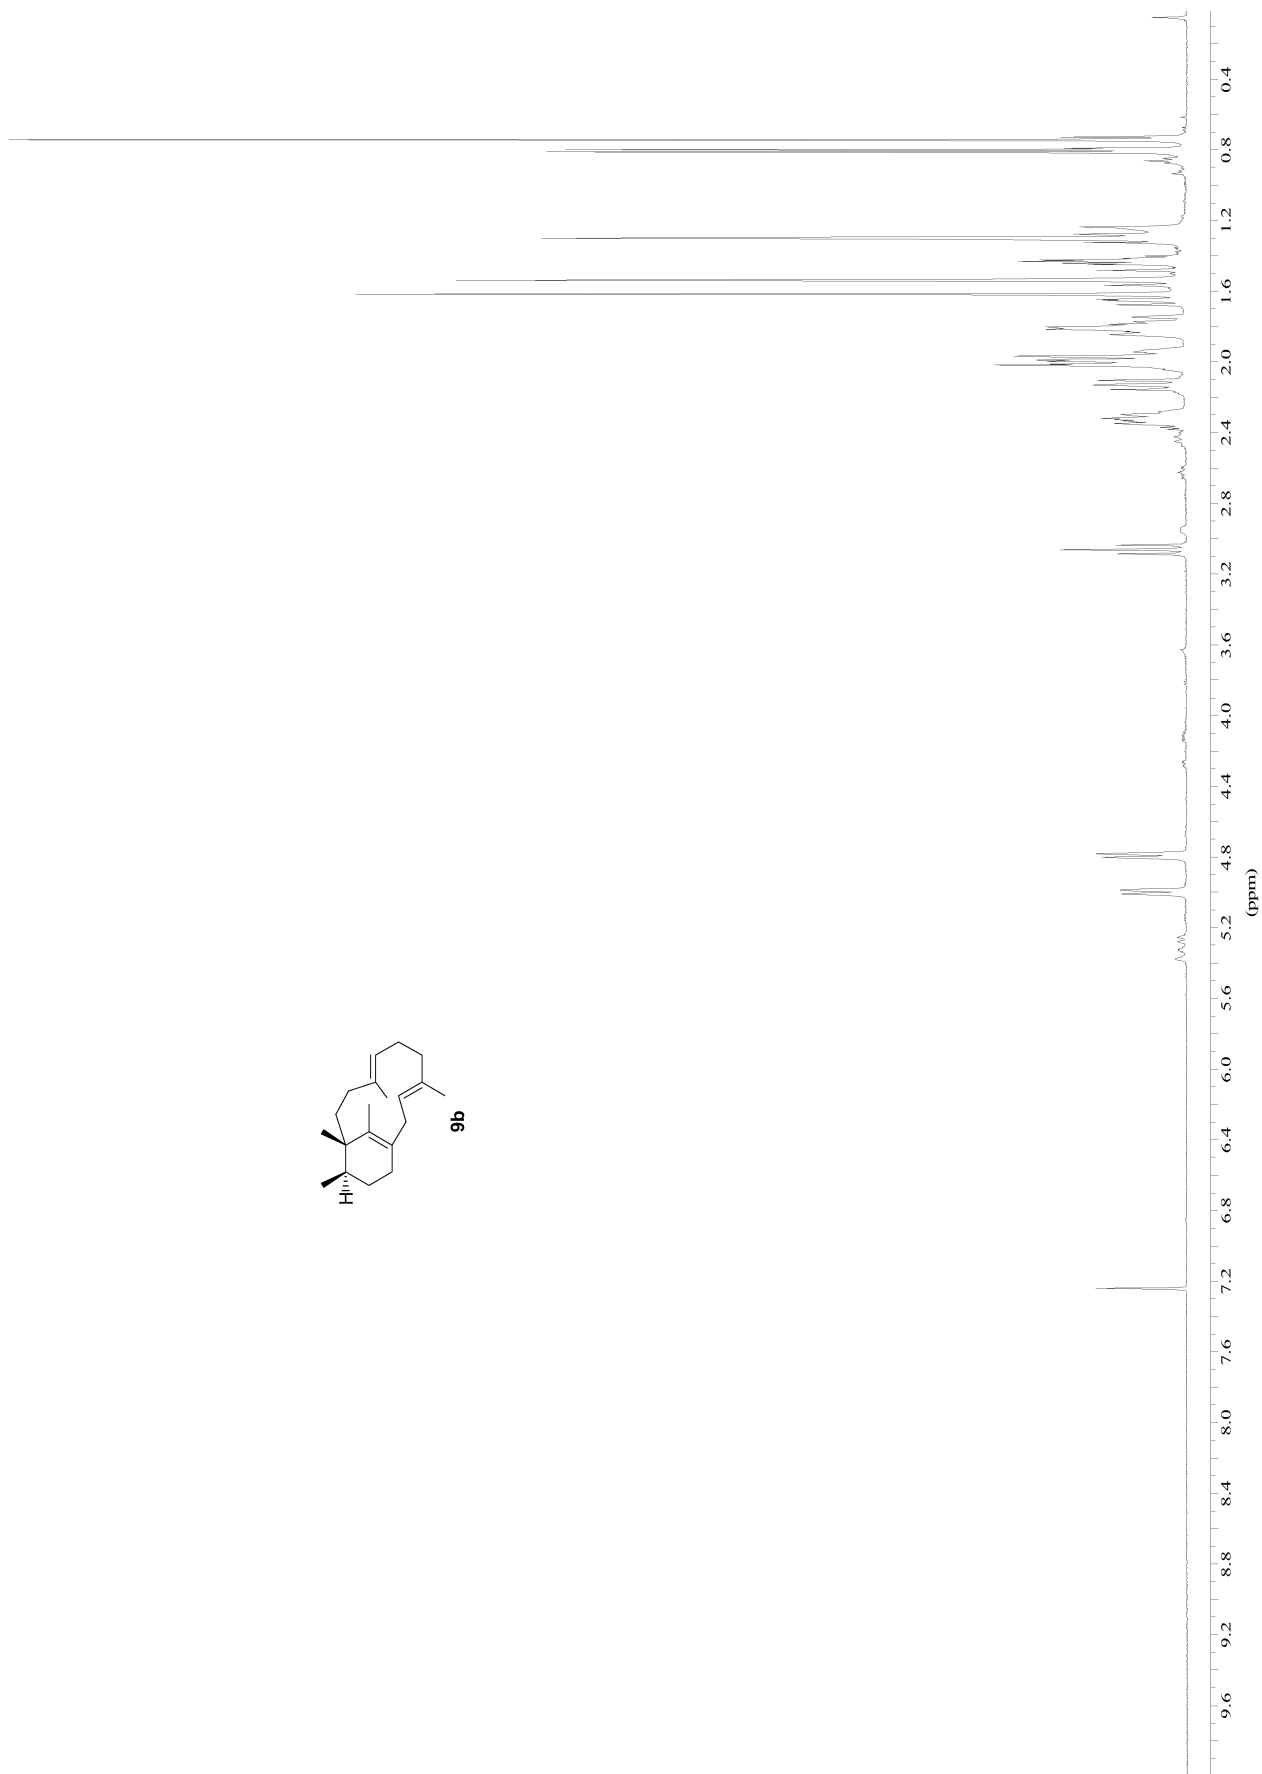

-S15-

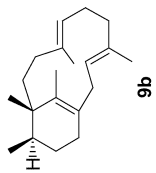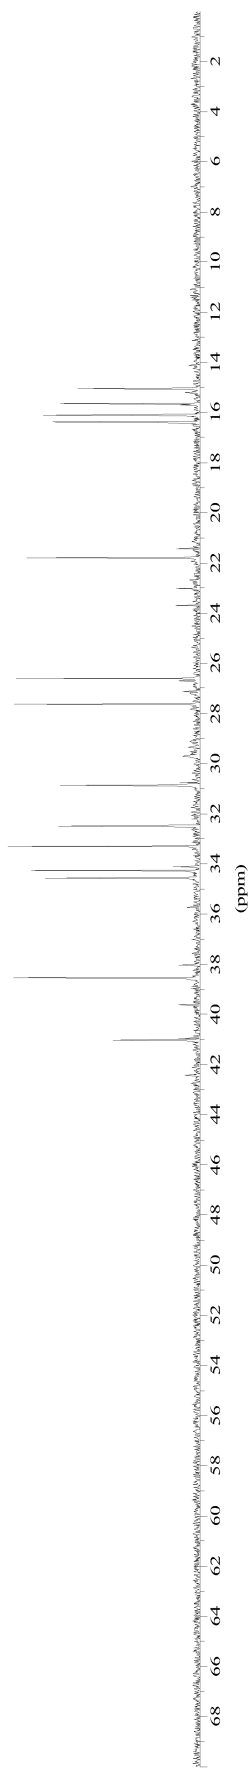

-S16-

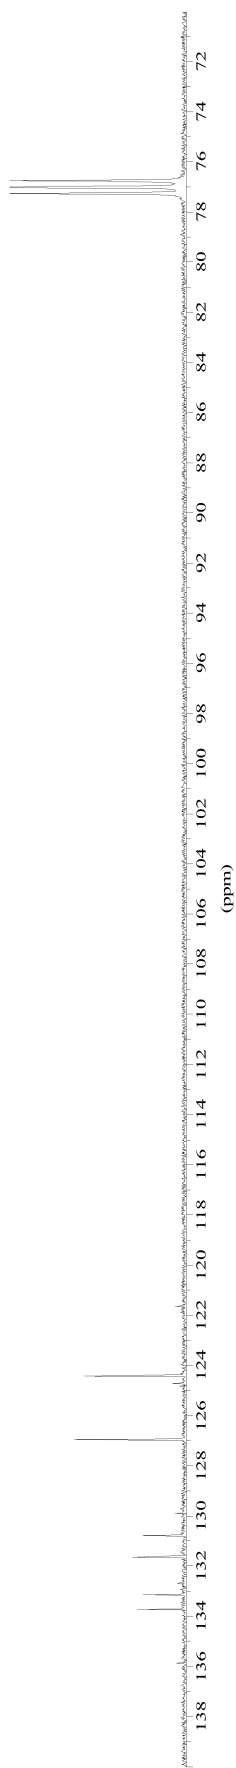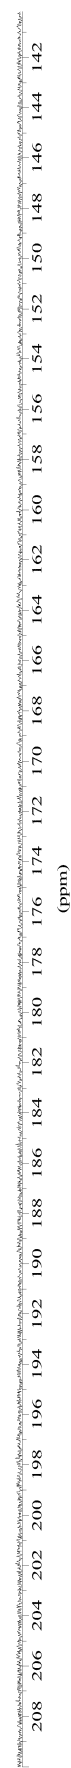



Comment  
 File piccpmt/104  
 noesy  
 Oikawa verticillol-(BF3)-(-78)-f  
 r3 ? mg /60uL CDCl3  
 dH(Solv)=7.24ppm, dC(solv)=77.0p  
 pm  
 Bruker AMX-500/ GC-MS & NMR Lab.  
 Grad. Sch. Agric., Hokkaido Univ  
 H=piccpmt/101 C=piccpmt/102

\$ F2-Acquisition Parameters  
 Date Sat Nov 15 15:07:52 200  
 3  
 PULPROG noesygs.jp  
 TD 1024  
 NS 32  
 DS 4  
 D[0] 0.000003 sec  
 D[1] 1.943680 sec  
 D[9] 1.000000 sec  
 HL1 5 dB  
 INFO 0.000166 sec  
 P[1] 12.000000 usec  
 V9 2.000000 %  
 SW 6.022513 ppm  
 SWH 3012.048193 Hz  
 FIDRES 0.339968 Hz  
 AQ 0.169984 sec  
 RG 1024  
 NUCLEUS 1H  
 SF01 500.131493 MHz  
 BF1 500.130000 MHz  
 O1 1492.510573 MHz  
 SF02 0.000000 MHz  
 BF2 500.130000 MHz  
 O2 1492.510573 MHz  
 LOKNUC 2H  
 SOLVENT CDCl3  
 PROBHD 2.5 mm DUL 13C-1H-D Z-G  
 RD Z5541/008  
 TE 300 K  
 GRDPROG lsine  
 CNST[21] 30 %  
 D[16] 0.000100 sec  
 P[16] 1000.000000 usec  
 L[21] 100  
 \$ F1-Acquisition Parameters  
 TD 256  
 NDO 2  
 SW 6.022513 ppm  
 SWH 3012.048193 Hz  
 FIDRES 0.084992 Hz  
 \$ F2-Processing Parameters  
 SI 512  
 SF 500.130023435046  
 OFFSET 5.948652  
 HZpPT 5.882910 Hz  
 MC2 of  
 WDW QSINE  
 SSB 2.000000  
 PH\_mod pk  
 PHC0 -11.780910 degree  
 PHC1 104.200000 degree  
 \$ F1-Processing Parameters  
 SI 512  
 SF 500.130023435046  
 OFFSET 5.948652  
 REVERSE no  
 HZpPT 5.882910 Hz  
 MC2 TPP1  
 WDW QSINE  
 SSB 2.000000  
 PH\_mod pk  
 PHC0 11.223440 degree  
 PHC1 -23.200000 degree  
 expt = ca. 7 hr

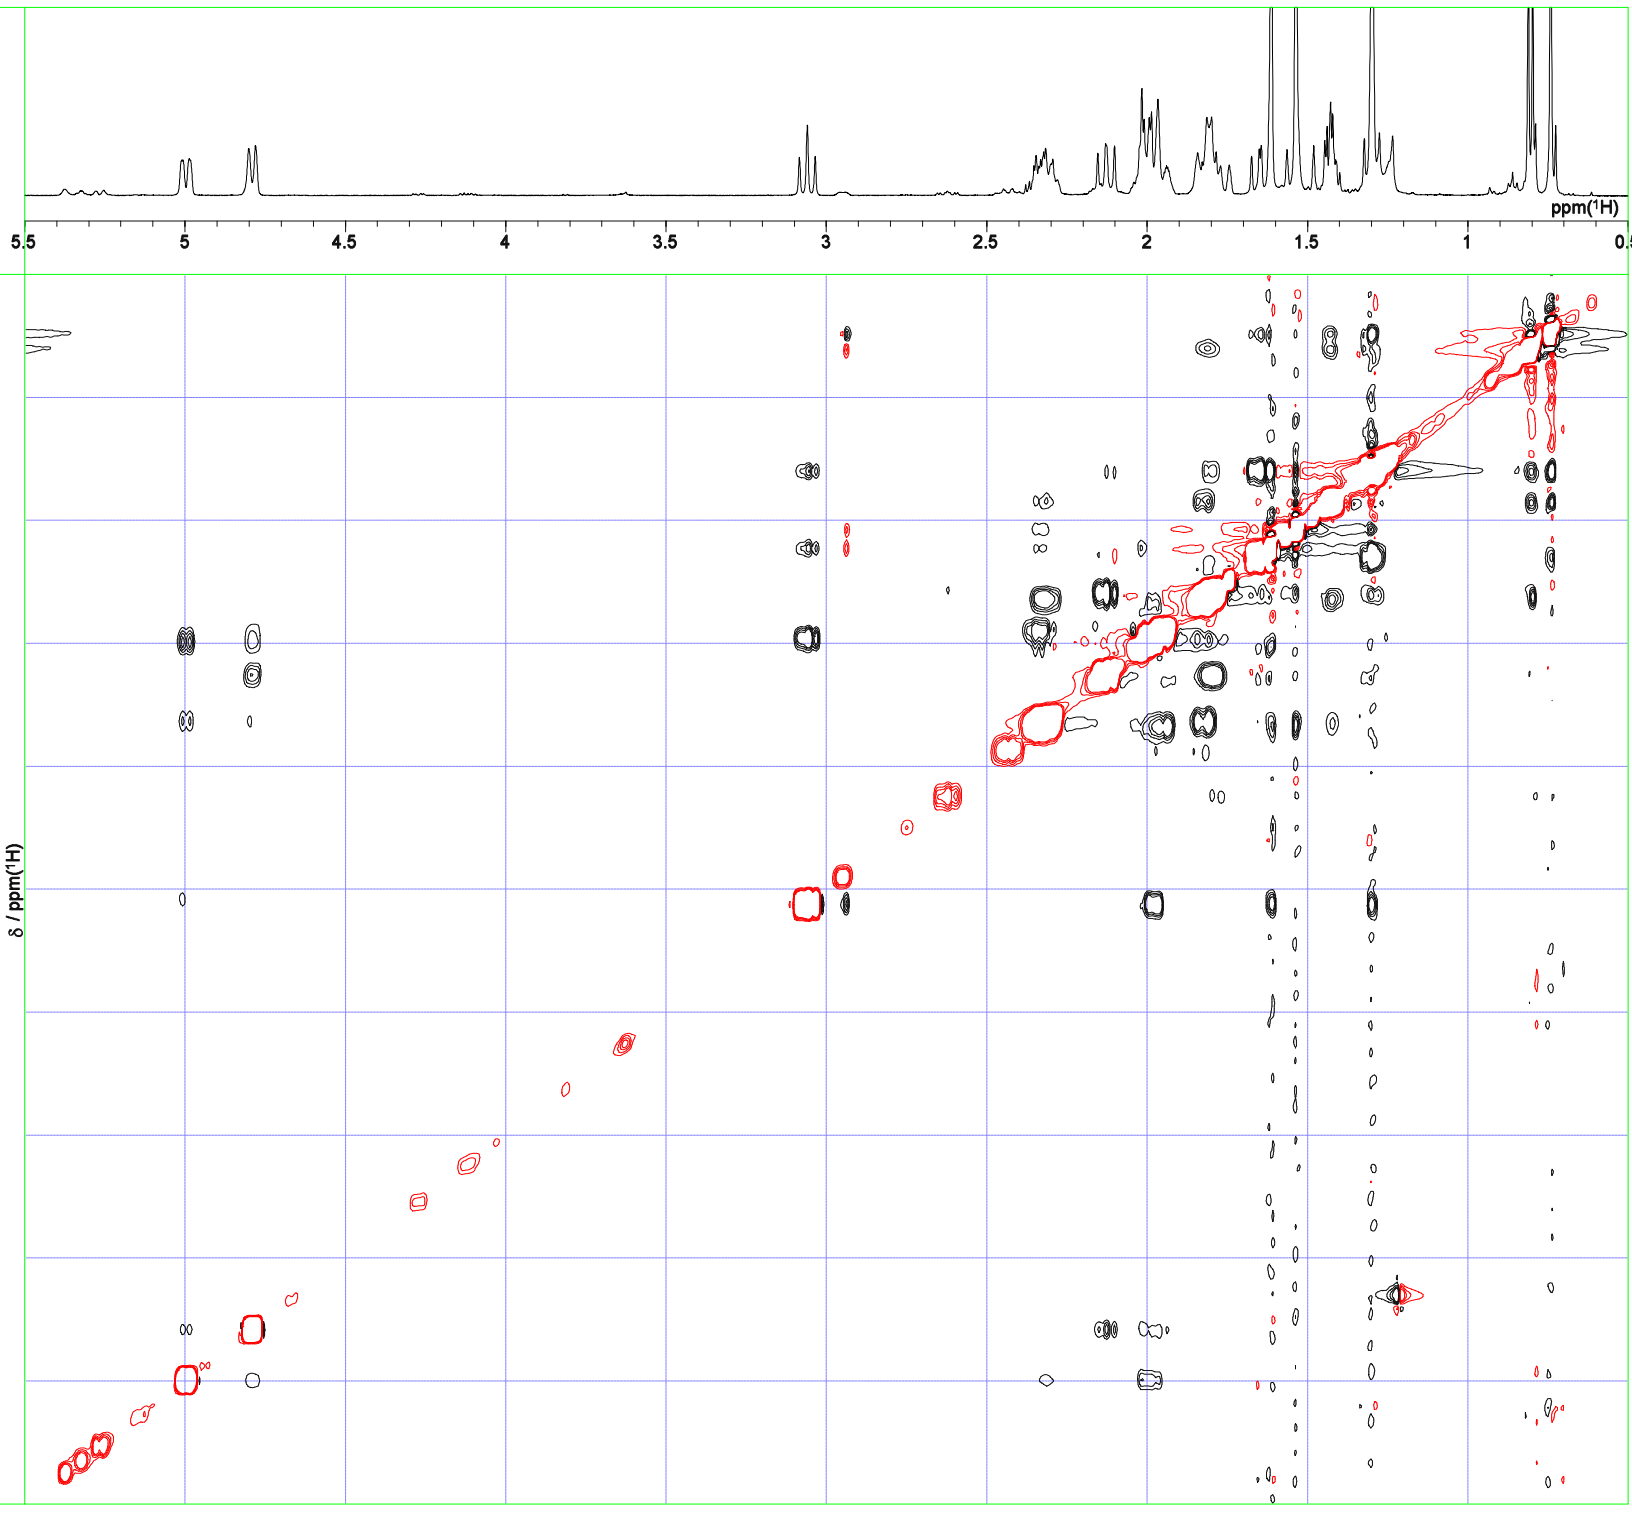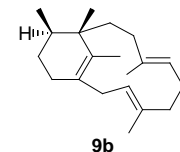

-S17-

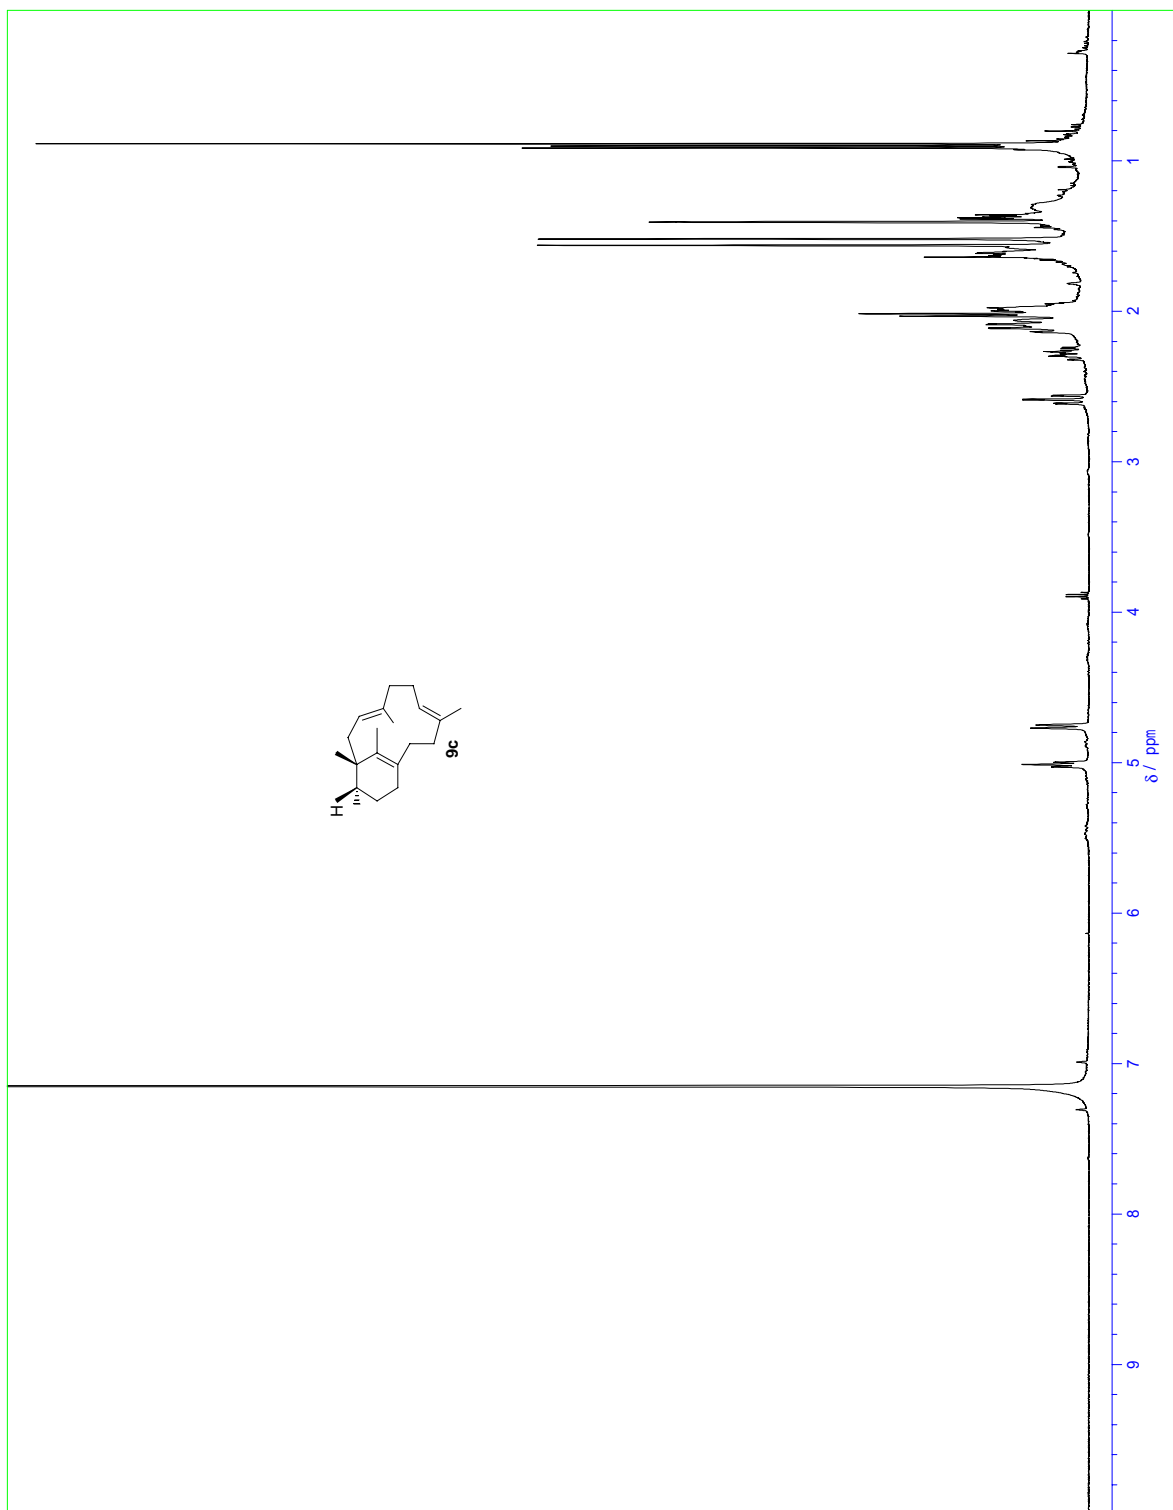

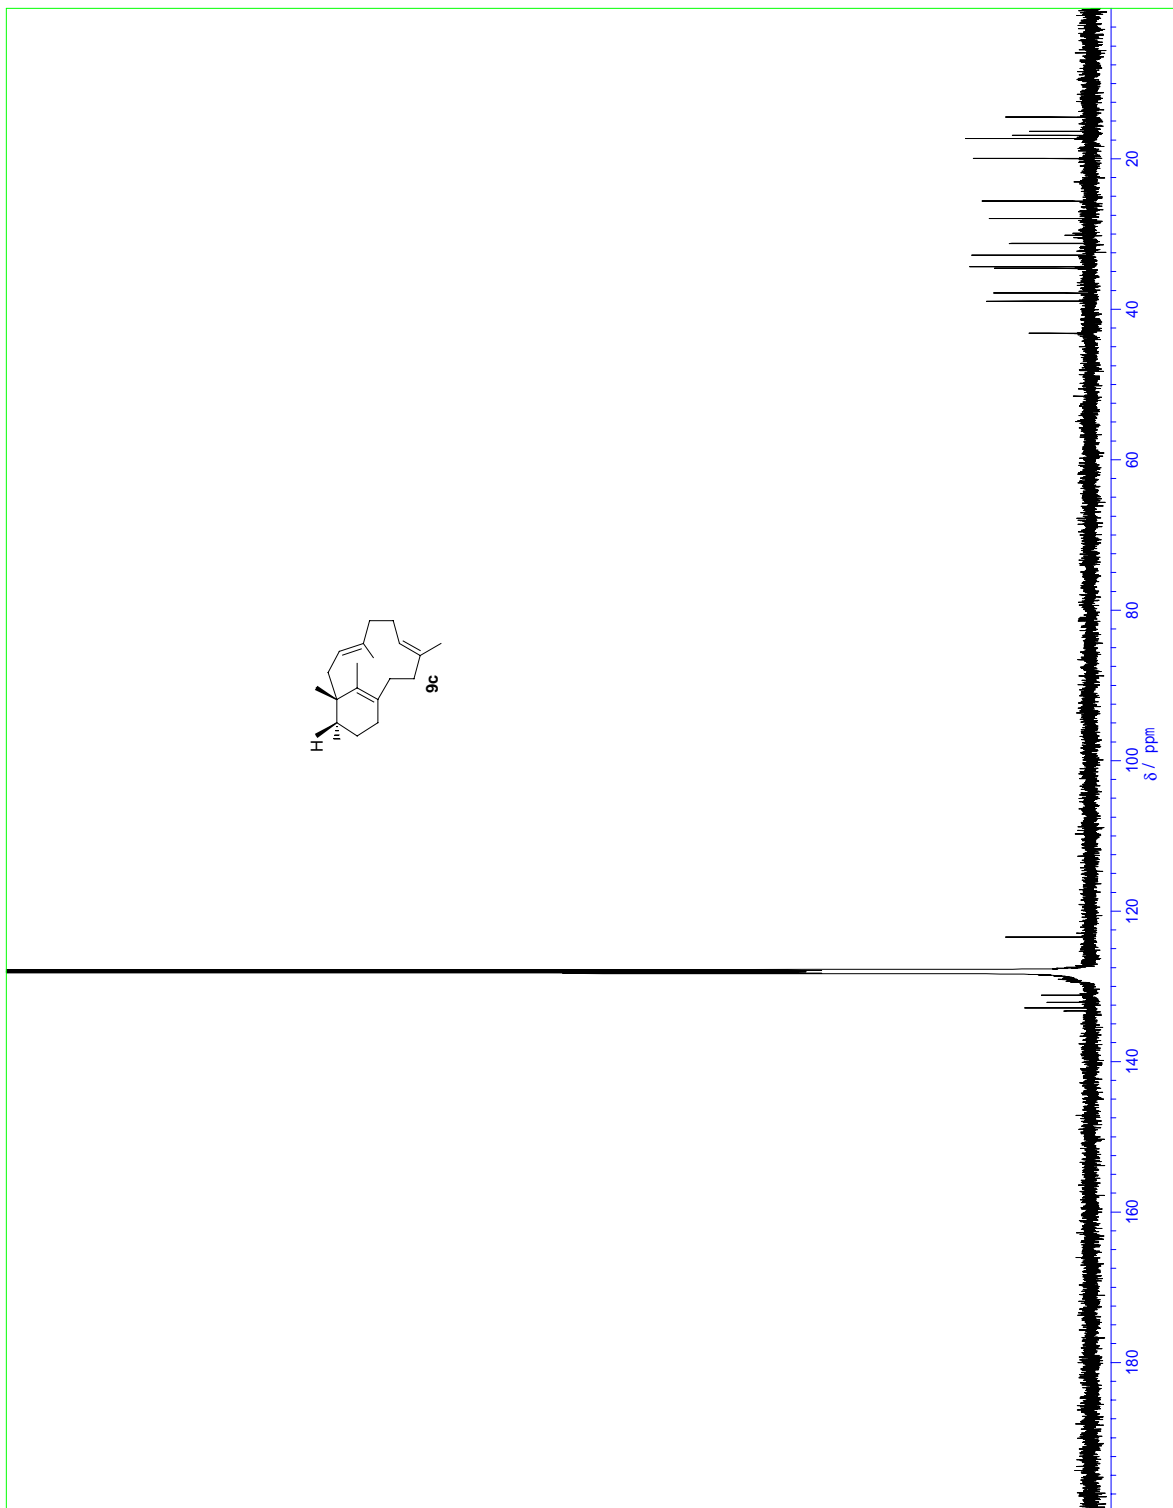

Exp 1.5

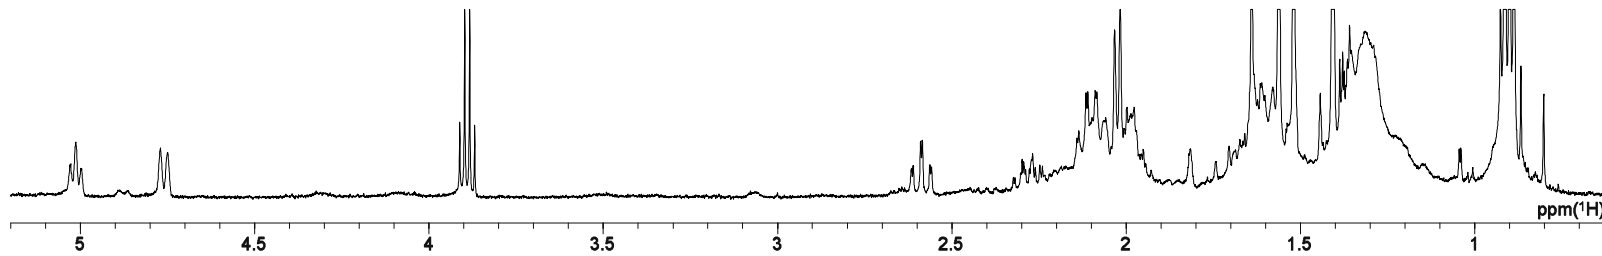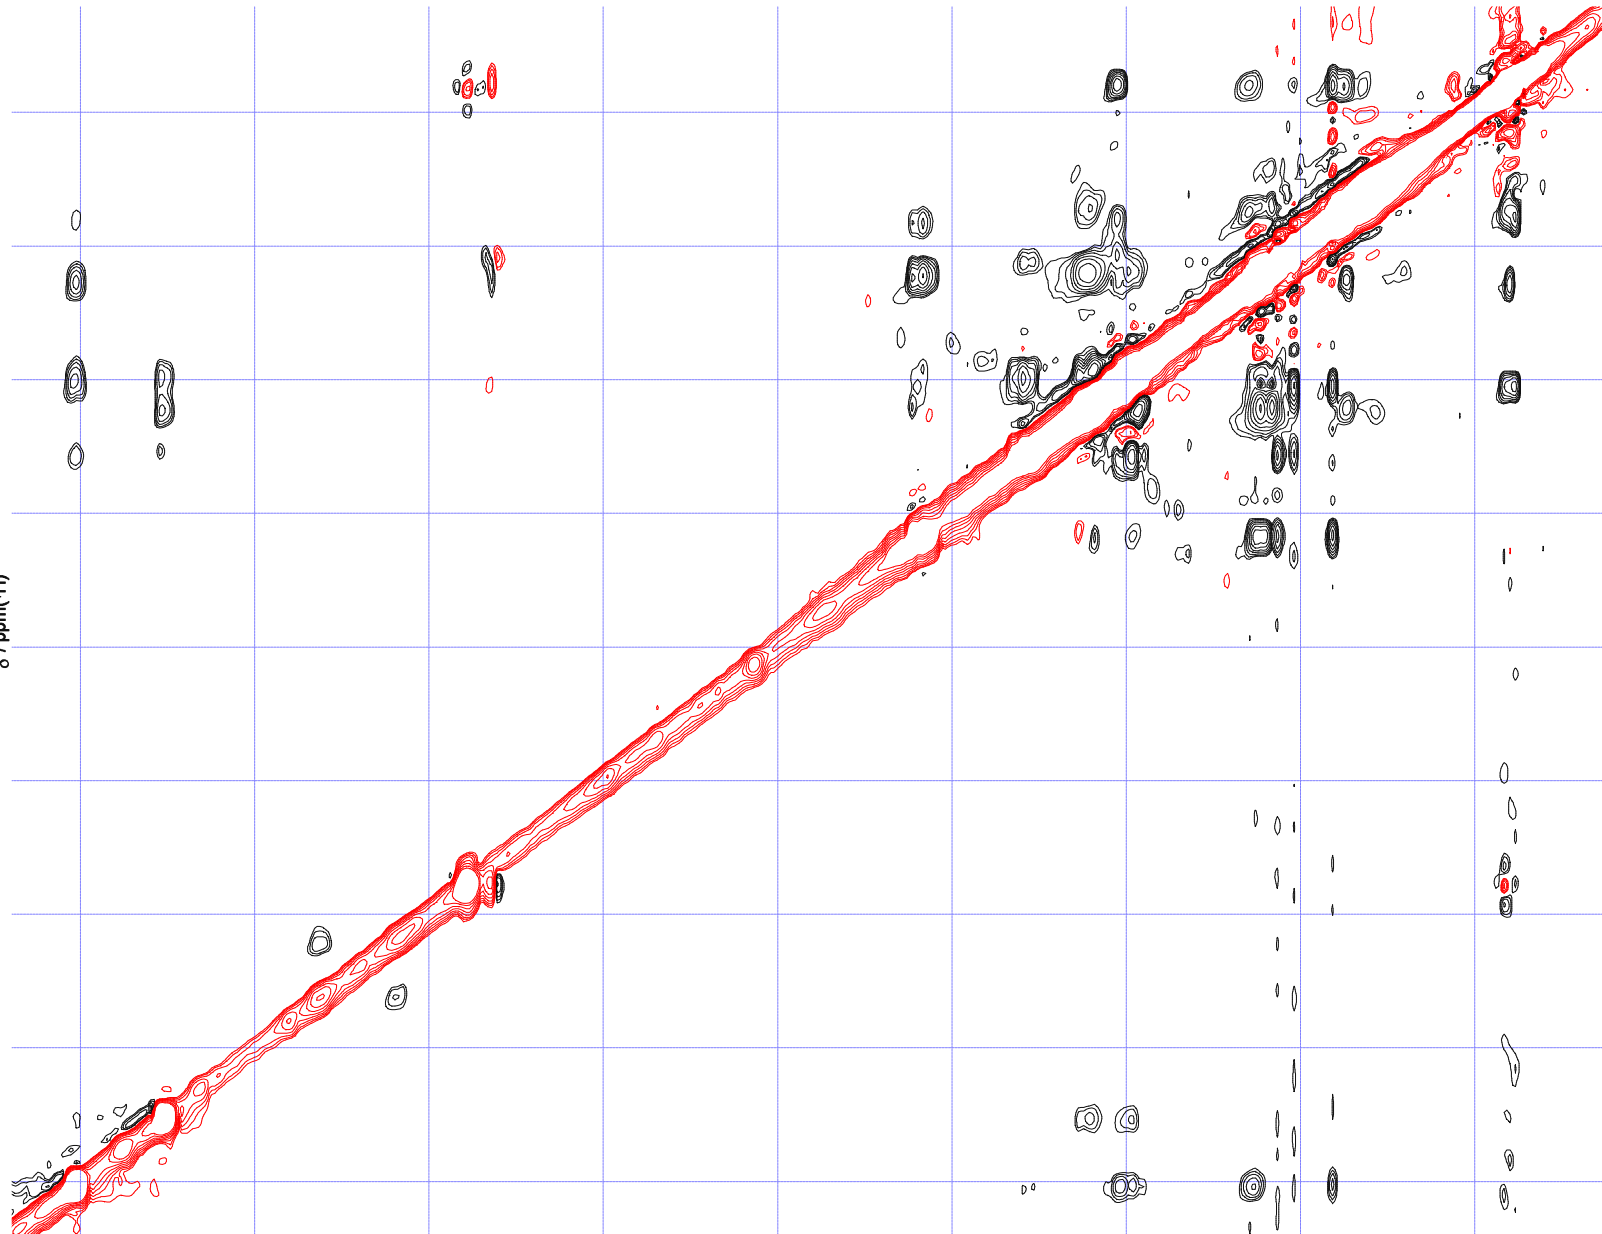

Comment  
File piccpmt/206  
noesy  
Oikawa No.2 (verticillol-27.5-L  
(OTf)3-10min-m/z=121,135) 0.3mg  
/90uL C6D6  
dh(sol)=7.15ppm, dC(sol)=128.  
ppm  
Bruker AMX-500/ GC-MS & NMR Lab  
Grad. Sch. Agric., Hokkaido Uni  
H=piccpmt/201 C=piccpmt/202

\$ F2-Acquisition Parameters  
Date Wed Feb 11 10:36:27 20  
4  
PULPROG noesy.jp  
TD 1024  
NS 256  
DS 4  
D[0] 0.000003 sec  
D[1] 1.750000 sec  
D[9] 1.000000 sec  
HL1 5 dB  
IN[0] 0.000123 sec  
P[1] 12.000000 usec  
v9 2.000000 %  
SW 8.127936 ppm  
SWH 4065.040650 Hz  
FIDRES 0.251904 Hz  
AQ 0.125952 sec  
RG 2048  
NUCLEUS 1H  
SF01 500.131973 MHz  
BF1 500.130000 MHz  
O1 1972.771511 MHz  
SF02 0.000000 MHz  
BF2 500.130000 MHz  
O2 1972.771511 MHz  
LOKNUC 2H  
SOLVENT C6D6  
PROBHD 2.5 mm DUL 13C-1H-D Z-  
RD Z5541/008  
TE 300 K  
\$ F1-Acquisition Parameters  
TD 128  
ND0 2  
SW 8.127936 ppm  
SWH 4065.040650 Hz  
FIDRES 0.031488 Hz  
\$ F2-Processing Parameters  
SI 512  
SF 500.130062049003  
OFFSET 7.884435  
HZpPT 7.939531 Hz  
MC2 qf  
VDW QSINE  
SSB 2.000000  
PH\_mod pk  
PHC0 23.159380 degree  
PHC1 47.200000 degree  
\$ F1-Processing Parameters  
SI 512  
SF 500.130062049003  
OFFSET 7.884435  
REVERSE no  
HZpPT 7.939531 Hz  
MC2 TPP1  
VDW QSINE  
SSB 2.000000  
PH\_mod pk  
PHC0 11.223440 degree  
PHC1 -23.200000 degree  
ME\_mod LPfr  
NCOEF 16  
LPBIN 256  
expt = ca. 27 hr

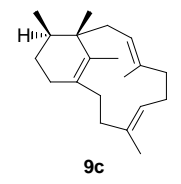

-S20-

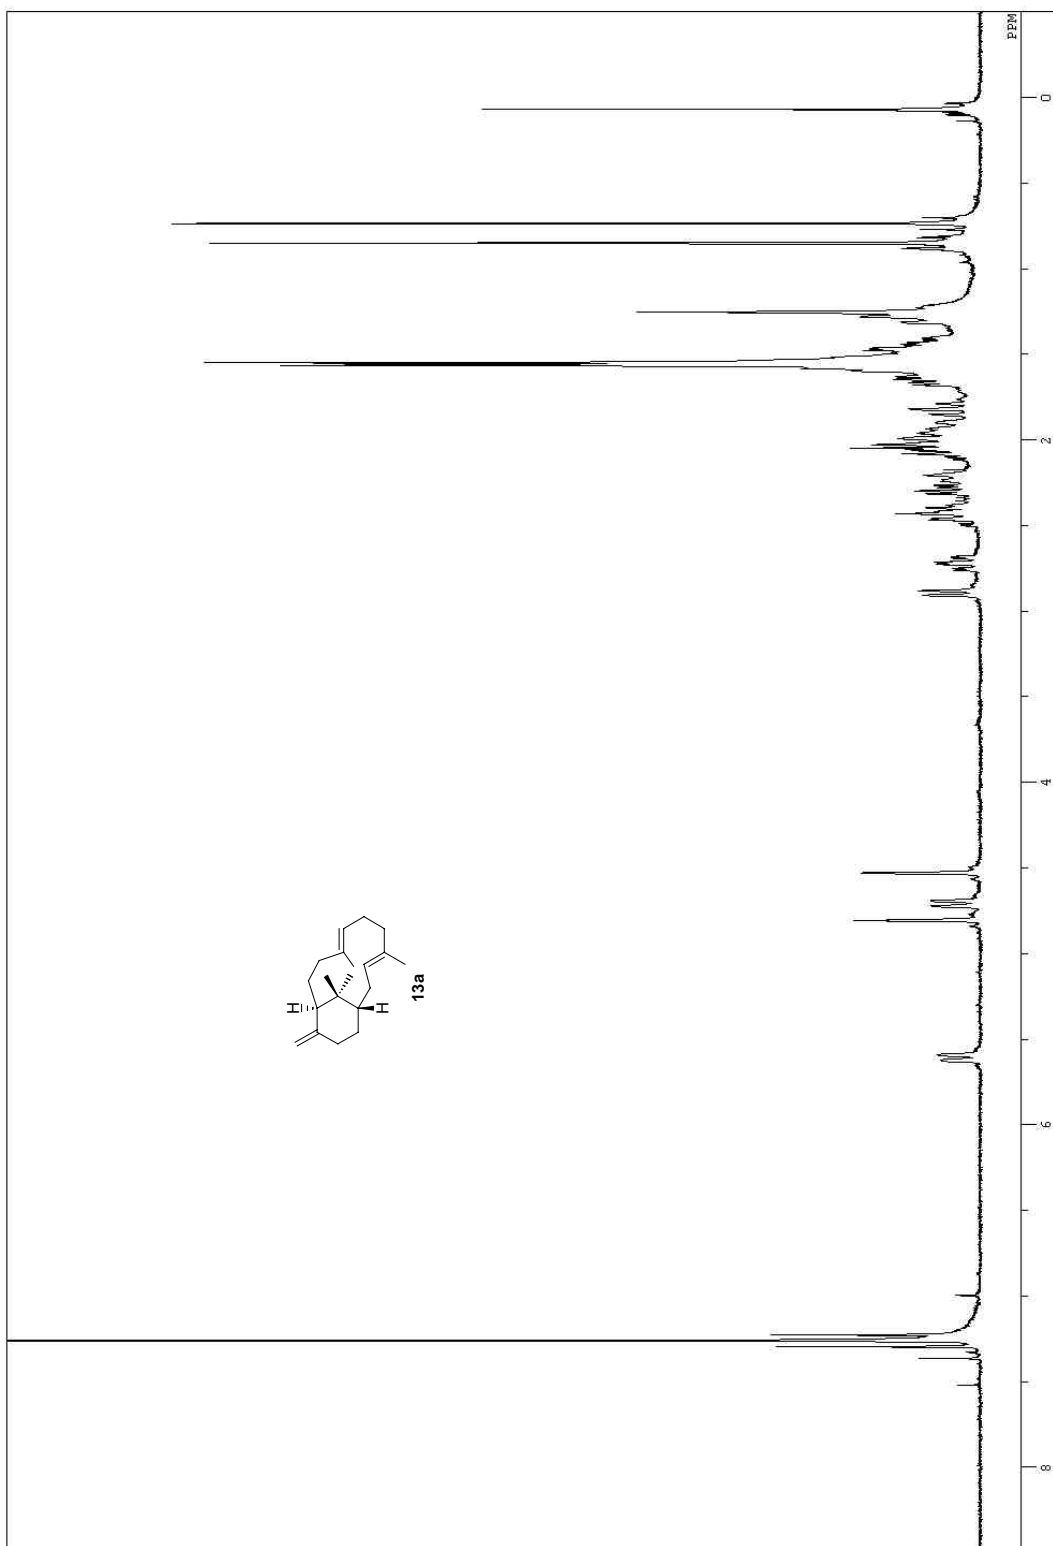

-S21-

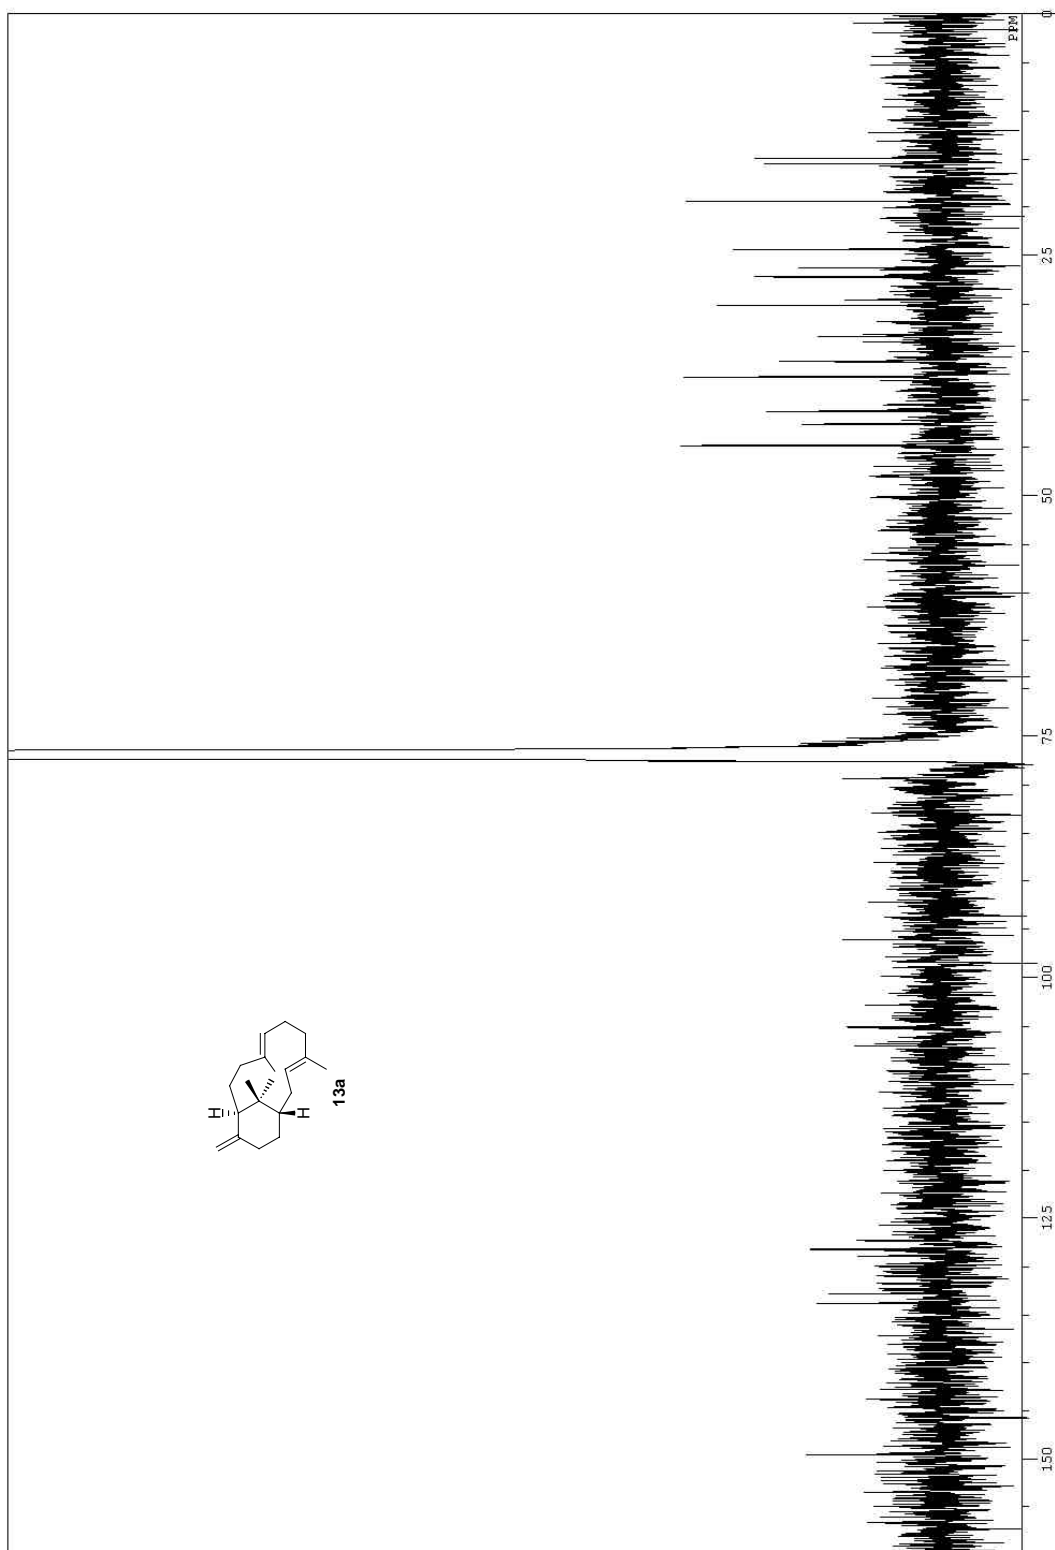

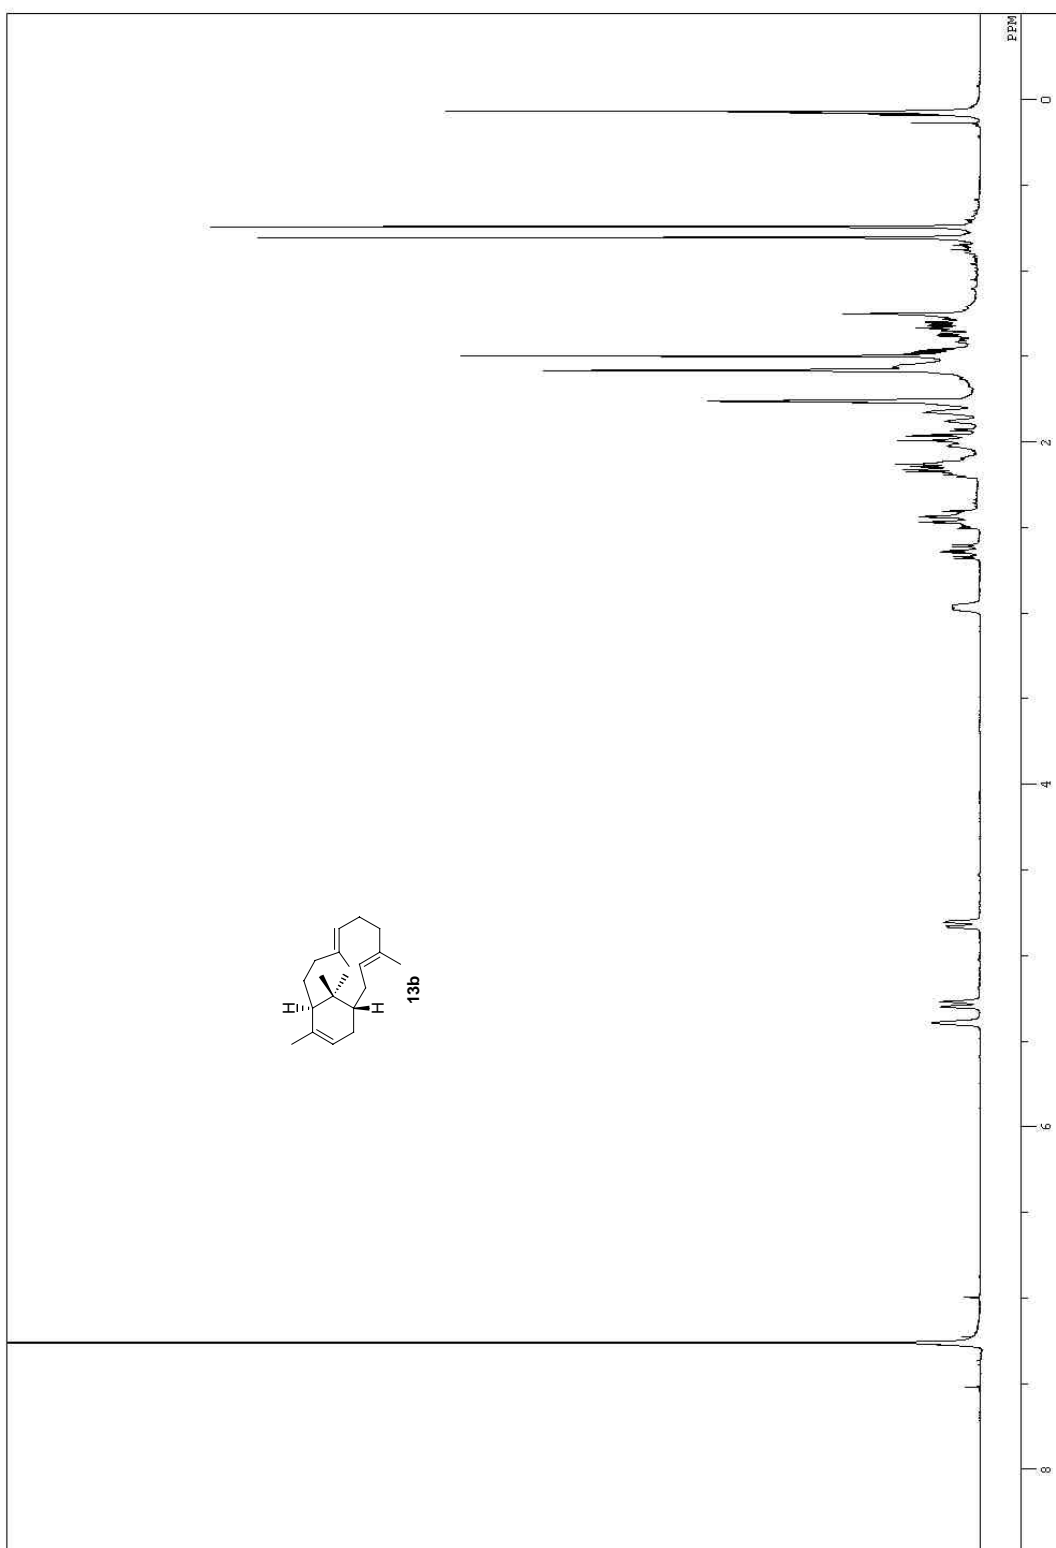

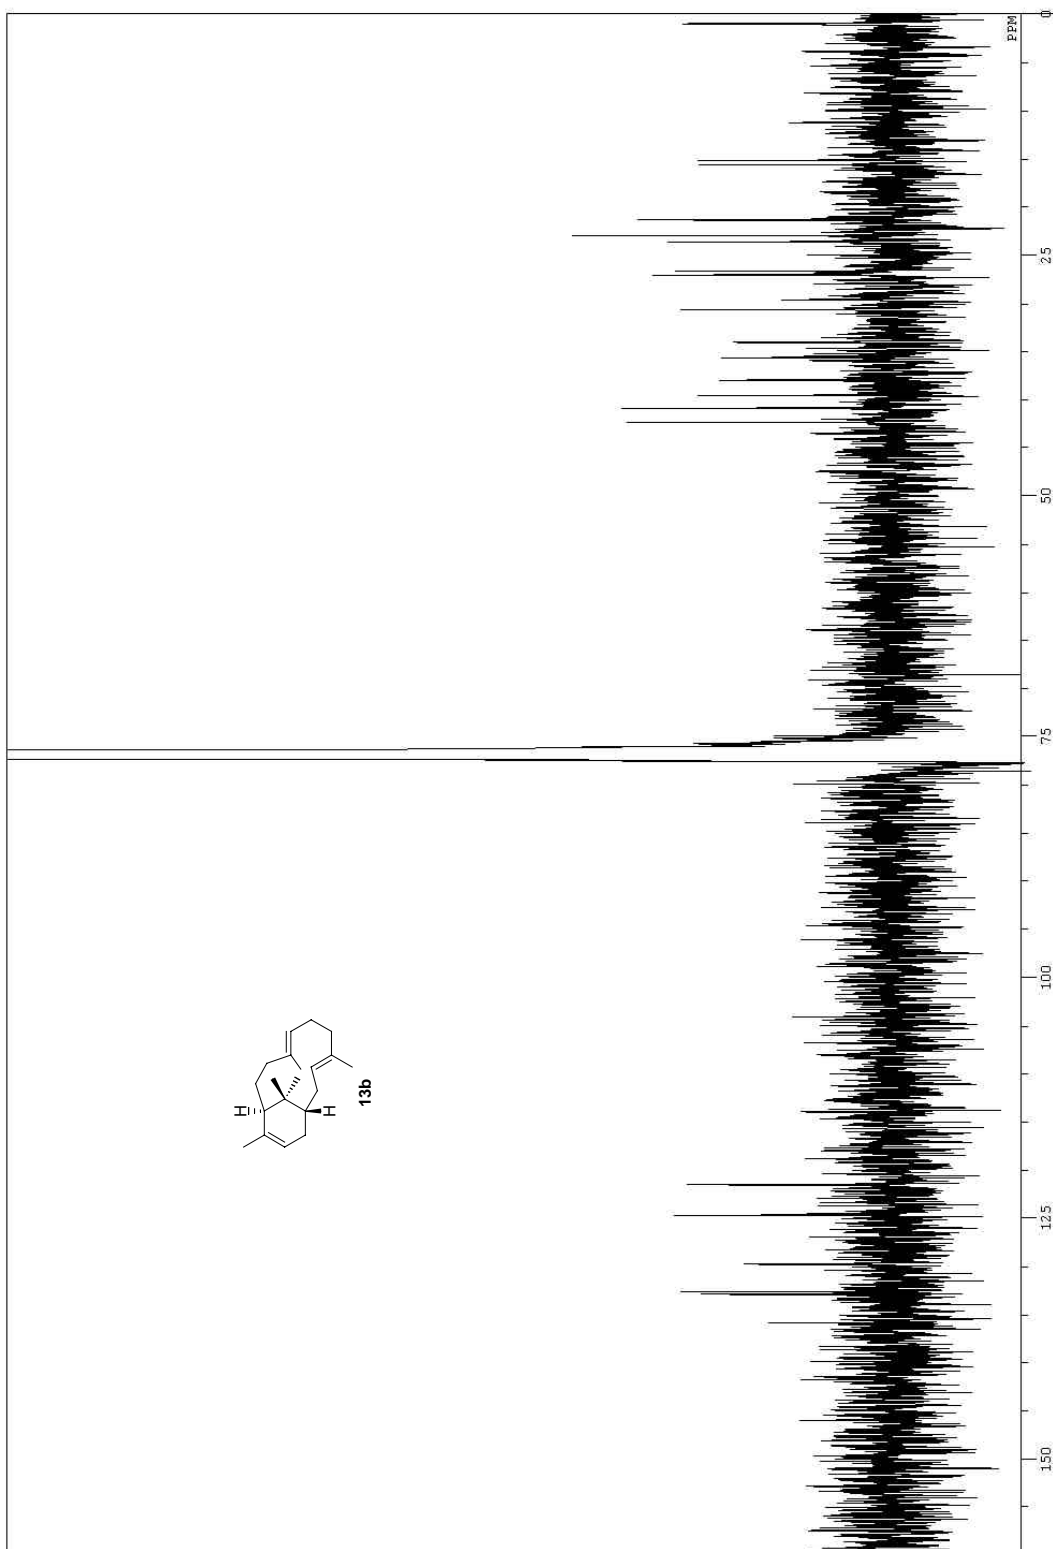



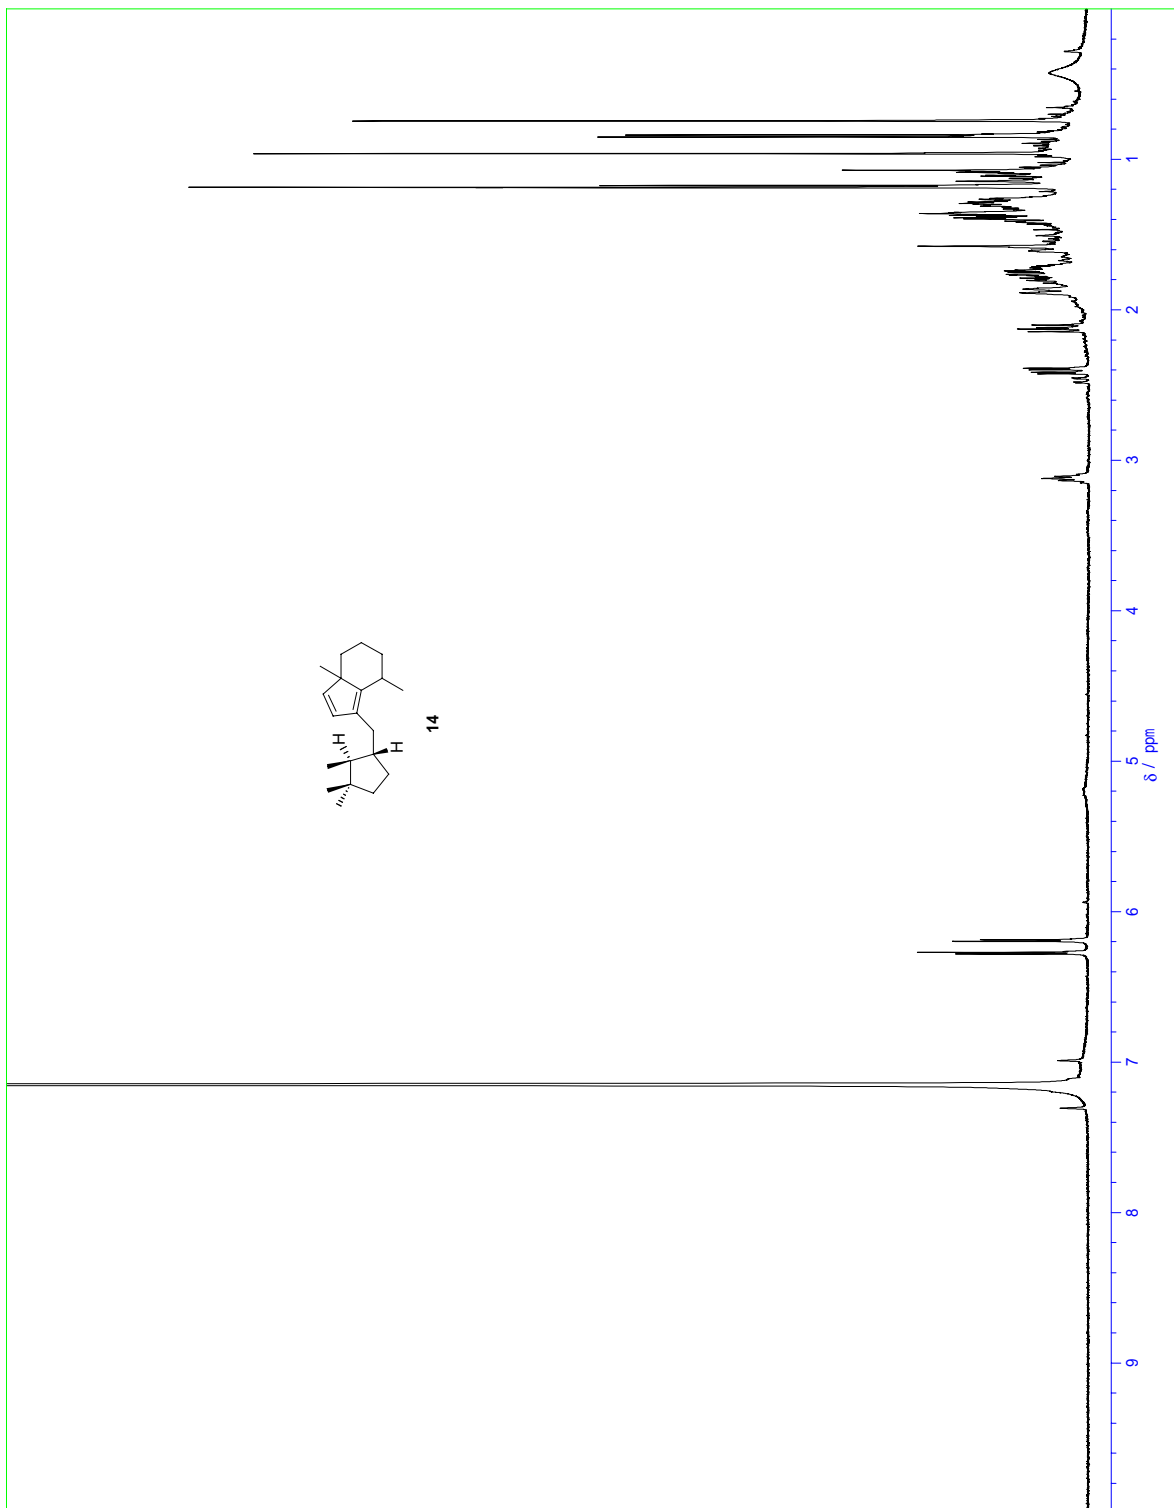

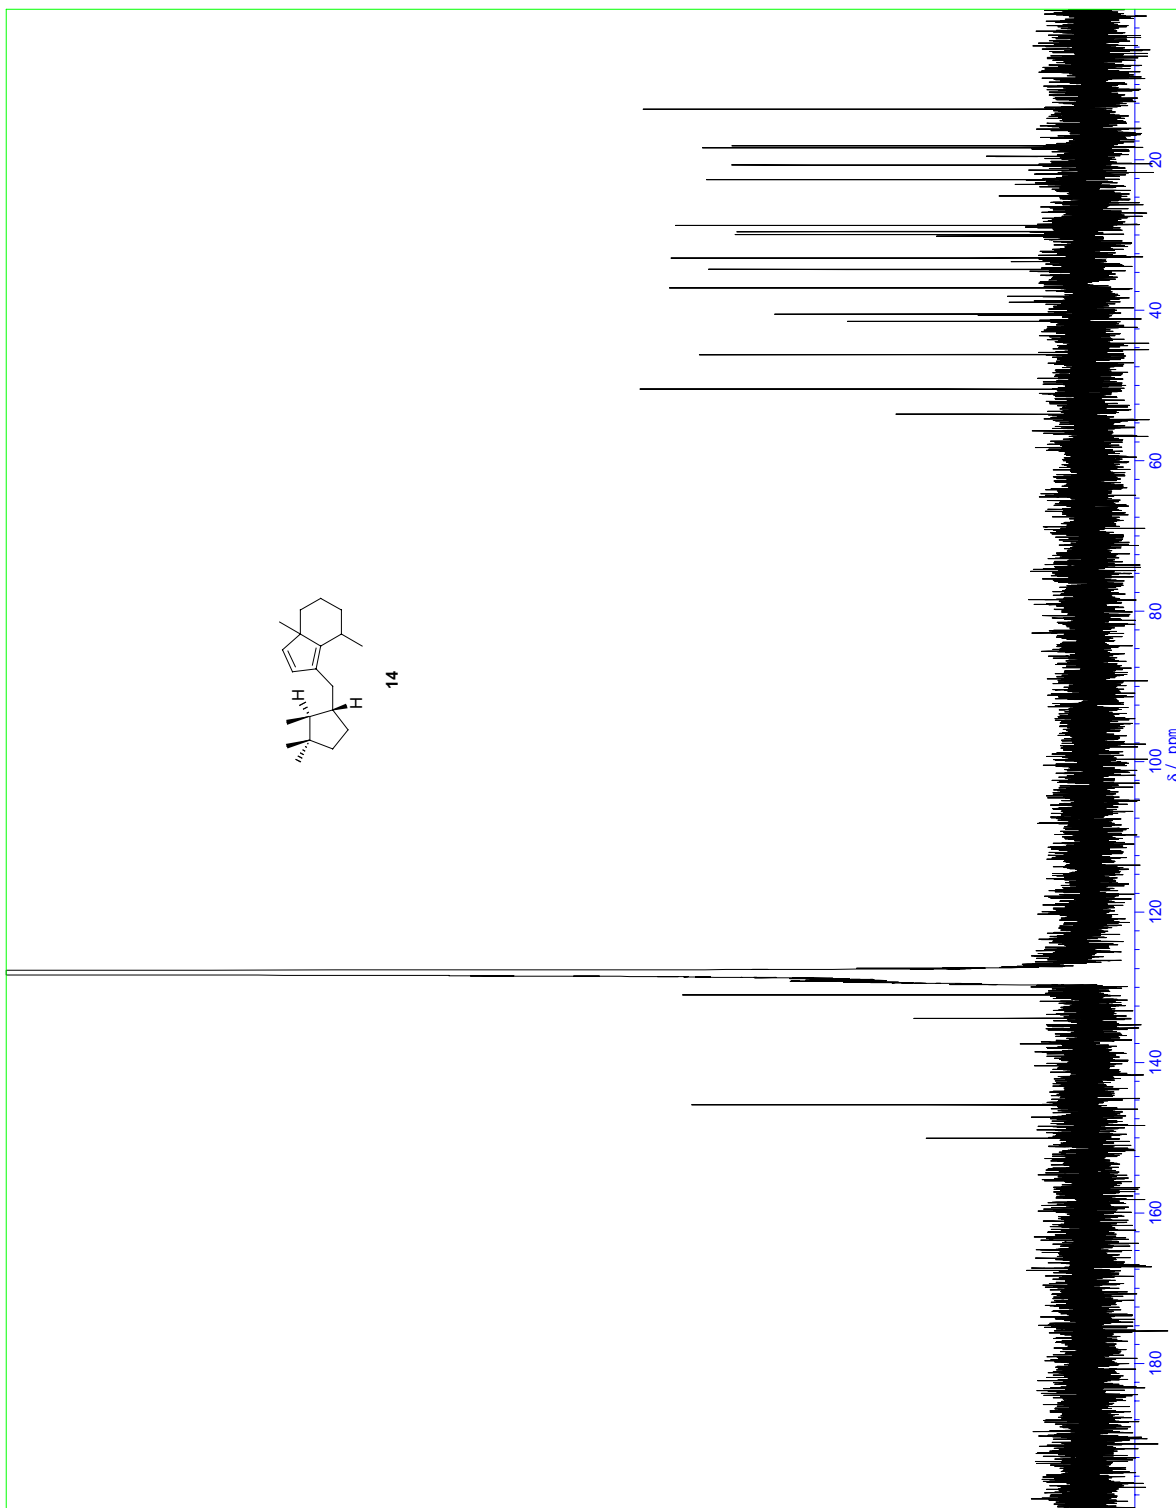

Exp 1.5

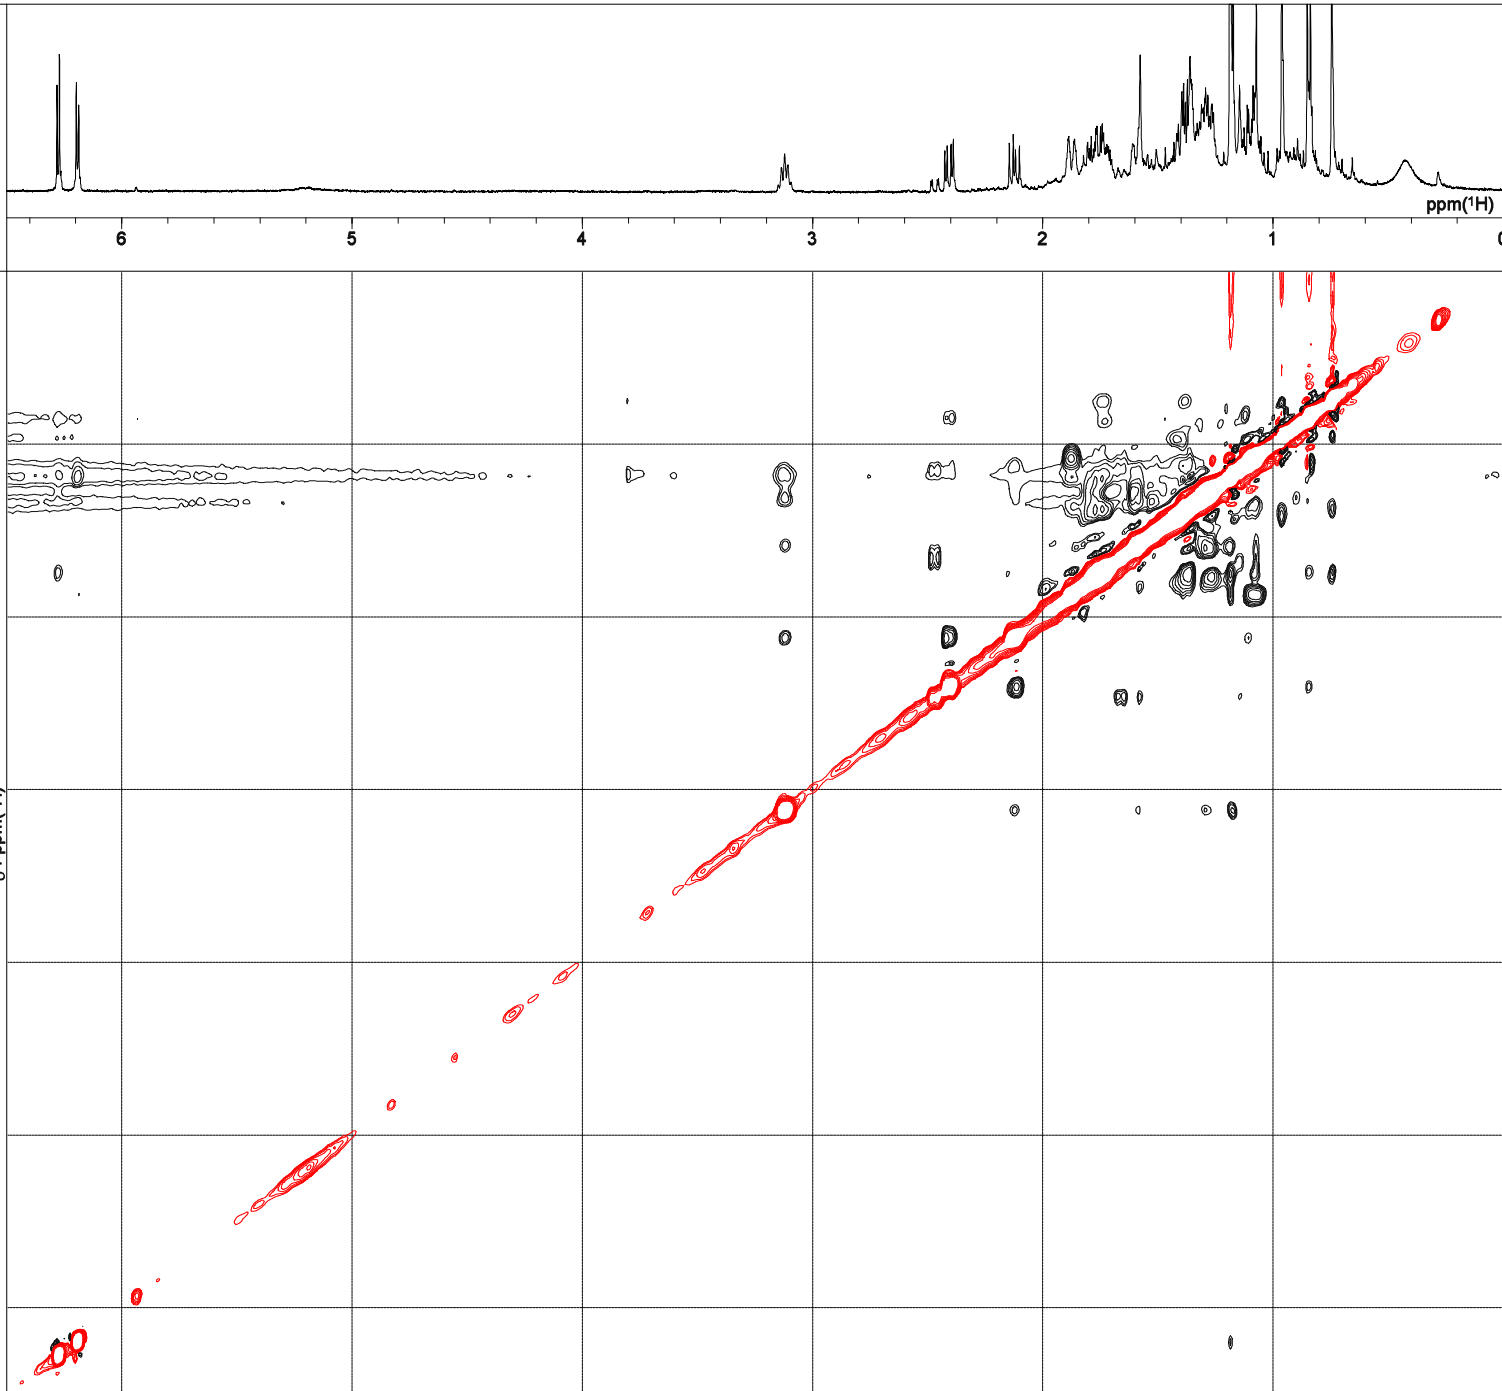

Comment  
File piccpmt/506  
noesy  
Oikawa Ver2-7 TiCl4-95 mg /90u  
L C6D6  
dH(Solv)=7.15ppm, dC(solv)=128.  
Oppm  
Bruker AMX-500/ GC-MS & NMR Lab  
Grad. Sch. Agric., Hokkaido Uni  
v.  
H=piccpmt/501 C=piccpmt/502

\$ F2-Acquisition Parameters  
Date Mon Aug 30 18:28:05 20  
04  
PULPROG noesy.jp  
TD 1024  
NS 256  
DS 4  
D[0] 0.000003 sec  
D[1] 1.750000 sec  
D[9] 1.000000 sec  
HL1 5 dB  
IN[0] 0.000123 sec  
P[1] 12.000000 usec  
V9 2.000000 %  
SW 8.127936 ppm  
SWH 4065.040650 Hz  
FIDRES 0.251904 Hz  
AQ 0.125952 sec  
RG 2048  
NUCLEUS 1H

\$ F1-Acquisition Parameters  
TD 128  
NDO 2  
SW 8.127936 ppm  
SWH 4065.040650 Hz  
FIDRES 0.031488 Hz

\$ F2-Processing Parameters  
SI 512  
SF 500.130062049003  
OFFSET 7.884435  
HZpPT 7.939531 Hz  
MC2 qf  
WDW QSINE  
SSB 2.000000  
PH\_mod pk  
PHC0 45.822670 degree  
PHC1 55.400020 degree

\$ F1-Processing Parameters  
SI 512  
SF 500.130062049003  
OFFSET 7.884435  
REVERSE no  
HZpPT 7.939531 Hz  
MC2 TPPI  
WDW QSINE  
SSB 2.000000  
PH\_mod pk  
PHC0 11.223440 degree  
PHC1 -23.200000 degree  
ME\_mod LPfr  
NCOEF 16  
LPBIN 256  
expt = ca. 27 hr

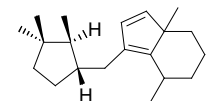

Supplement: b506411b.pdf [file b506411b.pdf]
